1 **Dissection of the cellular function of the ZBED6 transcription factor in mouse**  
2 **myoblast cells using gene editing, RNAseq and proteomics**

3

4 Shady Younis<sup>1</sup>, Rakan Naboulsi<sup>1</sup>, Xuan Wang<sup>2</sup>, Xiaofang Cao<sup>1</sup>, Mårten Larsson<sup>1</sup>, Ernest

5 Sargsyan<sup>2</sup>, Peter Bergsten<sup>2</sup>, Nils Welsh<sup>2</sup>, Leif Andersson<sup>1,3,4</sup>

6

7 <sup>1</sup>Science for Life Laboratory, Department of Medical Biochemistry and Microbiology, Uppsala

8 University, SE-751 23 Uppsala, Sweden. <sup>2</sup>Science for Life Laboratory, Department of Medical

9 Cell Biology, Uppsala University, SE-751 23 Uppsala, Sweden. <sup>3</sup>Department of Animal

10 Breeding and Genetics, Swedish University of Agricultural Sciences, SE-75007 Uppsala,

11 Sweden. <sup>4</sup>Department of Veterinary Integrative Biosciences, Texas A&M University, College

12 Station, TX 77843, USA.

13

14

15

## 16 SUMMARY

17 The transcription factor ZBED6 acts as a repressor of *Igf2* and affects directly or indirectly the  
18 transcriptional regulation of thousands of genes. Here, we use gene editing in mouse C2C12  
19 myoblasts and show that ZBED6 regulates *Igf2* exclusively through its binding site 5'-GGCTCG-  
20 3' in intron 1 of *Igf2*. Deletion of this motif (*Igf2*<sup>AGGCT</sup>) or complete ablation of *Zbed6* leads to  
21 ~20-fold up-regulation of IGF2 protein. Quantitative proteomics revealed an activation of Ras  
22 signaling pathway in both *Zbed6*<sup>-/-</sup> and *Igf2*<sup>AGGCT</sup> myoblasts, and a significant enrichment of  
23 mitochondrial membrane proteins among proteins showing altered expression in *Zbed6*<sup>-/-</sup>  
24 myoblasts. Both *Zbed6*<sup>-/-</sup> and *Igf2*<sup>AGGCT</sup> myoblasts showed a faster growth rate and developed  
25 myotube hypertrophy. These cells exhibited an increased O<sub>2</sub> consumption rate, due to IGF2 up-  
26 regulation. Transcriptome analysis revealed ~30% overlap between differentially expressed  
27 genes in *Zbed6*<sup>-/-</sup> and *Igf2*<sup>AGGCT</sup> myotubes, with an enrichment of up-regulated genes involved in  
28 muscle development. In contrast, ZBED6-overexpression in myoblasts led to cell apoptosis, cell  
29 cycle arrest, reduced mitochondrial activities and ceased myoblast differentiation. The  
30 similarities in growth and differentiation phenotypes observed in *Zbed6*<sup>-/-</sup> and *Igf2*<sup>AGGCT</sup>  
31 myoblasts demonstrates that ZBED6 affects mitochondrial activity and myogenesis largely  
32 through its regulation of IGF2 expression. This study suggests that the interaction between  
33 ZBED6-*Igf2* may be a therapeutic target for human diseases where anabolism is impaired.

34

## 35 Keywords

36 IGF2, ZBED6, mitochondria, myogenesis and gene editing

37

## 38 INTRODUCTION

39

40 The ZBED6 transcription factor is unique to placental mammals and has evolved from a  
41 domesticated DNA transposon located in the first intron of *ZC3H11A*, a zinc-finger protein with  
42 RNA-binding capacity ( Markl jung et al., 2009; Younis et al., 2018a). ZBED6 was identified as a  
43 repressor of insulin-like growth factor 2 (*IGF2*) expression following the identification of a  
44 mutation in *IGF2* intron 3 in domestic pigs (Van Laere et al., 2003; Markl jung et al., 2009). This  
45 mutation disrupts a ZBED6 binding site and leads to a 3-fold increase in *IGF2* mRNA  
46 expression in pig skeletal muscle, which in turn results in increased muscle mass and reduced  
47 subcutaneous fat deposition. We have previously reported that ZBED6 has thousands of putative  
48 binding sites in human and mouse genomes, with a strong enrichment in the vicinity of  
49 transcription start sites (TSS) of genes involved in development and transcriptional regulation  
50 (Markl jung et al., 2009; Jiang et al., 2014; Akhtar Ali et al., 2015; Wang et al., 2018). However,  
51 it is still unknown which of these genes, besides *Igf2*, are true functional targets of ZBED6.  
52 Silencing of *Zbed6* expression in mouse C2C12 myoblasts using small interfering RNA (siRNA)  
53 resulted in differential expression of about 700 genes, including a 3-fold up-regulation of *Igf2*  
54 mRNA (Jiang et al., 2014). IGF2 is an essential growth factor in skeletal muscle development  
55 and has a role in the initiation of myoblast differentiation (Florini et al., 1991). Recently, we  
56 have developed *Zbed6*<sup>-/-</sup> and *Igf2* knock-in mice, the latter carrying the pig mutation at the  
57 ZBED6 binding site. These mice exhibited increased body weight and skeletal muscle growth  
58 (Younis et al., 2018b). However, the molecular mechanism how ZBED6 affects muscle growth  
59 has not been fully investigated. Particularly, the interaction between ZBED6 and *Igf2* during

60 myogenesis, and to which extent phenotypic changes associated with altered ZBED6 expression  
61 is mediated through its interaction with the *IGF2* locus has hitherto not been studied.

62 In recent years, the genome editing technique based on the microbial Clustered Regularly  
63 Interspaced Short Palindromic Repeats (CRISPR) and CRISPR associated protein 9 (Cas9)  
64 nucleases, has become the most efficient method to knock-out a gene of interest or manipulate a  
65 specific site in mammalian cells (Jinek et al., 2012; Ran et al., 2013). We employed this  
66 technology to explore the significance of *ZBED6-Igf2* interaction in the mouse myoblast C2C12  
67 cell line that has the ability to differentiate and form myotubes (Yaffe and Saxel, 1977). In the  
68 present study, we generated two models of engineered C2C12 cells, a *Zbed6* knock-out and a  
69 deletion of the ZBED6 binding site in an *Igf2* intron. The genetically modified C2C12 cells were  
70 induced to differentiate, followed by whole transcriptome analysis, mass spectrometry (MS)-  
71 based quantitative proteomics and detailed functional characterizations of myoblast proliferation  
72 and myotube formation.

73

## 74 **RESULTS**

75

### 76 **Efficient deletion of *Zbed6* and its binding site in *Igf2***

77 In order to explore to which extent phenotypic changes associated with altered expression of  
78 ZBED6 is due to its interaction with the *Igf2* locus, we established two genetically engineered  
79 C2C12 cell lines, one with complete *Zbed6* inactivation and the other with a deletion of the  
80 ZBED6 binding site in the first intron of the *Igf2* gene (chr7:142,664,244-142,664,249, mmu10).  
81 The CRISPR/Cas9 method was used to delete almost the entire coding sequence (2.5 kb out of  
82 2.9 kb) of *Zbed6* in C2C12 cells (Figure 1A). We genotyped 150 clones using multiplex PCR

83 (Figure 1B) and found that 10% of the clones were untargeted, while 90% were targeted with at  
84 least one guideRNA. Of these clones, 22% showed a frameshift in one allele, 74% showed a 2.5  
85 kb deletion of ZBED6 in single allele and 4% of the clones showed a 2.5 kb deletion in both  
86 alleles.

87 The ZBED6 binding motif 5'-GGCTCG-3' in *Igf2* intron 1 was targeted using a  
88 guideRNA that cleaves between the C and T nucleotides (Figure 1C). PCR screening of C2C12  
89 clones revealed several clones with deletions at this site, ranging in size from 4 to 120  
90 nucleotides. One of the clones showed a four-nucleotide deletion (GGCT) of the binding motif in  
91 both alleles. We named this clone *Igf2*<sup>AGGCT</sup> and used it for all downstream analysis together with  
92 the *Zbed6*<sup>-/-</sup> clones; a second clone (*Igf2*<sup>Δ120bp</sup>) was used to confirm the effect on cell growth (see  
93 below). The expression of the ZBED6 protein in the *Zbed6*<sup>-/-</sup> and *Igf2*<sup>AGGCT</sup> clones was evaluated  
94 by immunoblot analysis, which revealed complete ablation of ZBED6 expression in *Zbed6*<sup>-/-</sup>  
95 clones and normal expression in *Igf2*<sup>AGGCT</sup> cells in comparison to wild-type (WT) C2C12 cells  
96 (Figure 1D).

97

98 **Both *Zbed6*<sup>-/-</sup> and *Igf2*<sup>AGGCT</sup> myoblasts exhibit faster cell growth and massive up-regulation**  
99 **of *Igf2* expression**

100 The real-time measurement of growth rate showed that both *Zbed6*<sup>-/-</sup> and *Igf2*<sup>AGGCT</sup>/*Igf2*<sup>Δ120bp</sup>  
101 clones grow faster than the WT (Cas9) cells (Figures 1E and 1F); the WT (Cas9) cells here refer  
102 to WT cells treated with CRISPR/Cas9 reagents without guideRNA and kept at similar selection  
103 conditions as the targeted cells. In order to explore the effect of this condition on cell growth, we  
104 measured the growth rate of WT (Cas9) versus the WT C2C12 cells at early (P5), middle (P12)

105 and late (P20) cell passages. The WT (Cas9) had similar growth rate as the WT C2C12 cells at  
106 early and middle passage, while the late passage C2C12 cells grew slower (Figure 1G).

107 Expression analysis using quantitative reverse transcriptase PCR (RT-qPCR) revealed a  
108 more than 30-fold up-regulation of *Igf2* mRNA when ZBED6 was deleted or its binding site in  
109 *Igf2* was disrupted (Figure 1J). To verify that the increased expression of *Igf2* in *Zbed6*<sup>-/-</sup> and  
110 *Igf2*<sup>AGGCT</sup> cells indeed was caused by the loss of ZBED6 or its binding site, we generated and  
111 validated an expression construct that produces a ZBED6-GFP fusion protein (Figure 1H). We  
112 reintroduced ZBED6 into the *Zbed6*<sup>-/-</sup> and *Igf2*<sup>AGGCT</sup> clones by transient overexpression of  
113 ZBED6-GFP (ZBED6-OE). The GFP construct was used as control. qPCR analysis confirmed an  
114 efficient overexpression of *Zbed6* in WT, *Zbed6*<sup>-/-</sup> and *Igf2*<sup>AGGCT</sup> cells (Figure 1I). The  
115 overexpression of *Zbed6* in WT cells resulted in a significant 60% down-regulation of *Igf2*  
116 mRNA. Interestingly, reintroduction of ZBED6-GFP in *Zbed6*<sup>-/-</sup> clones significantly down-  
117 regulated the elevated expression of *Igf2*, while no changes were observed when ZBED6-GFP  
118 was over-expressed in *Igf2*<sup>AGGCT</sup> clones (Figure 1J). These results imply that ZBED6 represses  
119 *Igf2* expression exclusively through interaction with its binding site in *Igf2* intron 1.

120

### 121 ***Zbed6*<sup>-/-</sup> and *Igf2*<sup>AGGCT</sup> myoblasts develop myotube hypertrophy with improved contractile** 122 **properties after differentiation**

123 The differentiation profile of *Zbed6*<sup>-/-</sup> and *Igf2*<sup>AGGCT</sup> myoblasts was assessed by  
124 immunofluorescence staining of myotubes using myogenin and myosin heavy chain (MyHC)  
125 antibodies (Figure 2A). The differentiation of *Zbed6*<sup>-/-</sup> and *Igf2*<sup>AGGCT</sup> myoblasts resulted in  
126 formation of hypertrophic myotubes (Figure 2A), with significant increase in the differentiation  
127 index in *Zbed6*<sup>-/-</sup> and *Igf2*<sup>AGGCT</sup> myotubes in comparison to WT cells (Figure 2B). This was

128 associated with increased myosin heavy chain and myogenin expression in *Zbed6*<sup>-/-</sup> and  
129 *Igf2*<sup>AGGCT</sup> myotubes (Figure 2C and 2D).

130

131 **Quantitative SILAC proteomic and transcriptomic analyses of *Zbed6*<sup>-/-</sup> and *Igf2*<sup>AGGCT</sup>**  
132 **myoblasts**

133 To determine the possible transcriptional targets of ZBED6 during myogenesis, we performed  
134 both transcriptomic and mass spectrometry (MS)-based quantitative proteomic analyses of  
135 *Zbed6*<sup>-/-</sup>, *Igf2*<sup>AGGCT</sup> and WT myoblasts. Differentially regulated genes/proteins and pathways  
136 were analyzed with a special focus on genes that showed differential expression in both *Zbed6*<sup>-/-</sup>  
137 and *Igf2*<sup>AGGCT</sup> myoblasts in order to explore to which extent the observed changes in gene  
138 expression in *Zbed6*<sup>-/-</sup> clones are secondary effects due to increased IGF2 expression.

139 The Stable Isotope Labeling with Amino Acids in Cell Culture (SILAC)-MS technique  
140 was used to quantify the changes in the total proteome of the mutant myoblasts. Quantification  
141 analysis using MaxQuant identified around 4,000 proteins in each cell line with at least two  
142 unique peptides detected in each replicate. The differential expression (DE) analysis of SILAC  
143 data showed 312 and 855 DE proteins in *Zbed6*<sup>-/-</sup> medium and lysate fractions, respectively, and  
144 220 and 350 DE proteins in *Igf2*<sup>AGGCT</sup> medium and lysate fractions, respectively ( $P < 0.05$ , after  
145 Benjamini–Hochberg correction for multiple testing), (Figure S1, Table S1). The transcriptome  
146 analysis of *Zbed6*<sup>-/-</sup>, *Igf2*<sup>AGGCT</sup> and WT myoblasts identified around 12,000 expressed genes with  
147 at least one read count per million (cpm). DE analysis of transcriptome data revealed ~3,000 DE  
148 genes in *Zbed6*<sup>-/-</sup> and ~2,500 in *Igf2*<sup>AGGCT</sup> myoblasts (Table S2). We integrated the SILAC and  
149 RNA-seq data in order to explore the correlation between changes in mRNA and protein  
150 expression, to gain further understanding of how the ZBED6-*Igf2* axis affects myoblasts. We

151 detected 381 and 196 genes to be DE in both SILAC and RNA-seq in *Zbed6*<sup>-/-</sup> and *Igf2*<sup>AGGCT</sup>  
152 myoblasts, respectively. Moreover, we found a significant positive correlation between DE genes  
153 and proteins in *Zbed6*<sup>-/-</sup> (r=0.49) and *Igf2*<sup>AGGCT</sup> (r=0.55) myoblasts (Figure 3A). Strikingly, the  
154 dramatic up-regulation of *Igf2* was detected in both *Zbed6*<sup>-/-</sup> and *Igf2*<sup>AGGCT</sup> myoblasts at both the  
155 transcriptome and proteome level (Figure 3A).

156 In order to distinguish between the DE genes caused by ZBED6 inactivation and those  
157 that are secondary due to *Igf2* up-regulation, we calculated the overlap between DE genes and  
158 proteins in both *Zbed6*<sup>-/-</sup> and *Igf2*<sup>AGGCT</sup> myoblasts. This analysis showed 56 shared DE proteins in  
159 *Zbed6*<sup>-/-</sup> and *Igf2*<sup>AGGCT</sup> cells, and 325 DE proteins unique to *Zbed6*<sup>-/-</sup> myoblasts, while 140 was  
160 unique to *Igf2*<sup>AGGCT</sup> cells (Figure 3B, left). KEGG pathway analysis of those 56 shared DE  
161 proteins revealed a significant enrichment of proteins involved in extra cellular matrix  
162 (ECM)–receptor interaction, and the MAPK and RAS signaling pathways (Figure 3B, right).  
163 Interestingly, the cellular component analysis of DE proteins unique to *Zbed6*<sup>-/-</sup> myoblasts  
164 showed a significant enrichment for mitochondrial membrane proteins (Figure 3C), while a  
165 similar analysis for the 56 shared DE proteins and the DE proteins unique to *Igf2*<sup>AGGCT</sup> myoblasts  
166 showed an enrichment for extracellular matrix proteins, and not for mitochondrial terms (Figure  
167 S2).

168 Our previous ChIP-seq analysis for ZBED6 identified thousands of putative target genes  
169 in C2C12 myoblasts (Markljung et al., 2009; Jiang et al., 2014). Here, we combined the SILAC,  
170 RNA-seq and ChIP-seq data to find out functional targets for ZBED6. The previously described  
171 ChIP-seq peaks in C2C12 cells were associated with about 3,000 genes, i.e. about 15% of the  
172 genes in the mouse genome. As many as 1,001 of the about 4,000 proteins (25%) detected in the  
173 SILAC analysis corresponded to a gene associated with a ZBED6 ChIP-seq peak. This highly



174 significant overrepresentation ( $P < 0.001$ ) is consistent with the notion that ZBED6 binds open  
175 chromatin (Jiang et al., 2014). Since 25% of the proteins detected by SILAC corresponded to a  
176 gene associated with a ChIP-seq peak it is expected that 25% (95) of the 381 genes detected as  
177 differentially expressed both at the mRNA and protein level due to chance only. We found 98  
178 genes in our data (Figure 3D, left). This implies that we cannot draw any firm conclusion on true  
179 ZBED6 targets in mouse C2C12 cells, other than the well-established *Igf2* locus, based on these  
180 data. In fact, *Igf2* is the gene showing the most striking differentially expressed gene between  
181 WT and *Zbed6*<sup>-/-</sup> cells (Figure 3D, right). However, five other genes, highlighted in Figure 3D,  
182 showed a striking up-regulated expression after silencing of the ZBED6 repressor suggesting that  
183 they may be functional targets. The gene ontology (GO) analysis of the transcripts with  
184 significant up-regulation in *Zbed6*<sup>-/-</sup> myoblasts and associated with ChIP-seq peaks showed a  
185 significant enrichment for proteins involved in cellular response to insulin stimulus (Figure 3E).  
186 These genes include *Insulin Like Growth Factor 1 Receptor (Igf1r)*, *Phosphoinositide-3-Kinase*  
187 *Regulatory Subunit 1 (Pik3r1)*, and *Ectonucleotide pyrophosphatase phosphodiesterase 1*  
188 (*ENPP1*), a negative modulator of insulin receptor (IR) activation.

189

## 190 **ZBED6 modulates transcriptional regulation of differentiated myotubes partially through** 191 **IGF2 signaling**

192 To investigate the possible role of the ZBED6-*Igf2* axis on transcriptional regulation during  
193 myogenesis, we performed transcriptome analyses of *Zbed6*<sup>-/-</sup>, *Igf2*<sup>ΔGGCT</sup> and WT cells after  
194 differentiation into myotubes. First, we analyzed the differentially expressed (DE) genes in WT  
195 myoblasts vs. myotubes to explore the overall transcriptional changes during myotube formation.  
196 The counting of aligned reads using the STAR tool (Dobin et al., 2013) identified ~12,000

197 expressed genes in myoblasts with at least one read count per million (cpm) (Figure S3A). The  
198 expression of ~3,900 genes was found to be changed significantly, with 2,200 up-regulated and  
199 1,700 down-regulated after differentiation into myotubes ( $P < 0.05$ , after Benjamini–Hochberg  
200 correction for multiple testing), (Figure S3B). GO analysis of up-regulated genes revealed a  
201 significant enrichment of cell adhesion, muscle proteins and muscle contraction genes, while the  
202 down-regulated genes were enriched for cell cycle and mitotic nuclear division categories  
203 (Figure S3C).

204 Transcriptome analysis comparing WT and *Zbed6*<sup>-/-</sup> cells after differentiation identified  
205 2,673 DE genes (log fold change >0.5;  $P < 0.05$ , after Benjamini–Hochberg correction for  
206 multiple testing), with 1,243 up-regulated and 1,430 down-regulated genes. Furthermore, 2,630  
207 genes showed a significant differential expression in the comparison of *Igf2*<sup>AGGCT</sup> and WT cells  
208 after differentiation, with 1,278 up-regulated and 1,352 down-regulated in mutant cells (Table  
209 S4). The dissection of the DE genes based on the direction of the change revealed a highly  
210 significant 30% overlap between DE genes in *Zbed6*<sup>-/-</sup> and *Igf2*<sup>AGGCT</sup> myotubes (Figure 4A).

211 The expression of *Igf2* is known to be upregulated during myoblast differentiation  
212 (Florini et al., 1991). In this study, we detected the same pattern as *Igf2* was up-regulated 100-  
213 fold after differentiation of WT cells (Figure 4B). Furthermore, the *Igf2* mRNA expression was  
214 up-regulated 500-fold in *Zbed6*<sup>-/-</sup> and *Igf2*<sup>AGGCT</sup> myotubes in comparison to WT myoblast and 6-  
215 fold in comparison to WT myotubes (Figure 4B). Interestingly, this up-regulation of *Igf2*  
216 expression was accompanied with a significant but modest increase in the expression of the  
217 endogenous *Zbed6* mRNA (Figure 4C), which indicates a positive correlation between *Igf2* and  
218 *Zbed6* expression.

219 The GO analysis of the up-regulated genes in both *Zbed6*<sup>-/-</sup> and *Igf2*<sup>AGGCT</sup> myotubes  
220 exhibited a striking enrichment of muscle-specific genes (Figure 4D, left). This included genes  
221 for myosin heavy and light chains (*Myl1*, *Myl2*, *Myh1*, *Myh2*, *Myh7* and *Myh8*), troponins  
222 (*Tnnt1*, *Tnnt3*, *Tnnc1* and *Tnni2*), myomesins (*Myom1* and *Myom2*), alpha actinin (*Actn2* and  
223 *Actn3*), leiomodulin (*Lmod2* and *Lmod3*), titin (*Ttn*) and myoglobin (*Mb*). In contrast, genes  
224 involved in cell division and cell cycle regulation such as cyclins (*Ccnb1*, *Ccna2* and *Ccnb2*),  
225 were enriched among down-regulated genes in both *Zbed6*<sup>-/-</sup> and *Igf2*<sup>AGGCT</sup> myotubes (Figure 4D,  
226 right). The expression of genes belonging to these GO categories are presented as logCPM  
227 values in myoblast and myotubes (Figure 4E and 4F). The results demonstrate a remarkable shift  
228 in their expression before and after differentiation, and how these differences are enhanced in  
229 *Zbed6*<sup>-/-</sup> and *Igf2*<sup>AGGCT</sup> myotubes.

230

### 231 **ZBED6 over-expression impairs myoblast differentiation**

232 The role of ZBED6 in myogenesis was further investigated by overexpressing ZBED6 (ZBED6-  
233 OE) in C2C12 myoblasts and then induce differentiation. Immunofluorescence staining against  
234 myogenin and MyHC revealed poor differentiation of ZBED6-OE myoblasts, with a marked  
235 reduction in cells expressing myogenin and myosin (Figure 5A). This observation was in stark  
236 contrast to the myotube hypertrophy observed in *Zbed6*<sup>-/-</sup> C2C12 cells after differentiation. We  
237 performed RNA-seq analysis of ZBED6-OE and control cells after 72h of differentiation. The  
238 bioinformatic analysis of differentiated myoblasts revealed 1,560 down-regulated genes and  
239 1,157 up-regulated genes (log fold change >0.5; *P*<0.05, after Benjamini–Hochberg correction  
240 for multiple testing) in ZBED6-OE vs. control cells (Figure S4). The most affected genes in  
241 response to ZBED6-OE included down-regulation of *Igf2*, myogenin (*Myog*) and myosin heavy

242 chain 3 (*Myh3*) (Figure 5B, figure S4). The GO analysis of down-regulated genes showed a  
243 significant enrichment of muscle-specific genes, while the up-regulated genes were primarily  
244 related to cell cycle regulation and cell division (Table 1), thus the opposite trend compared with  
245 *Zbed6*<sup>-/-</sup> cells. As many as 463 genes were significantly down-regulated in differentiated ZBED6-  
246 OE myoblasts and significantly up-regulated in *Zbed6*<sup>-/-</sup> myotubes (Figure 5C). These represents  
247 about 40% of the up-regulated genes in *Zbed6*<sup>-/-</sup> myotubes. We examined these genes and the  
248 corresponding pathways in more detail. The GO analysis revealed a striking enrichment in  
249 muscle-specific categories (Table S5). Among the enriched KEGG pathways, we found cardiac  
250 muscle contraction, hypertrophic cardiomyopathy (HCM), and calcium, insulin and AMPK  
251 signaling (Table S5). We examined the genes present in the AMPK and insulin signaling  
252 pathways and compared their expression in *Zbed6*<sup>-/-</sup>, *Igf2*<sup>AGGCT</sup> and ZBED6-OE cells after  
253 differentiation. Interestingly, the key components of these pathways were found to be up-  
254 regulated in *Igf2*<sup>AGGCT</sup> myotubes as well (Figure 5D). For instance, the expression of  
255 phosphatidylinositol-4,5-bisphosphate 3-kinase catalytic subunit beta (*Pik3cb*), glycogen  
256 synthase 1 (*Gys1*) and AMP-activated protein kinase alpha2 (*Prkaa2*), beta2 (*Prkab2*) and  
257 gamma3 (*Prkag3*) subunits were found to be up-regulated in *Zbed6*<sup>-/-</sup> and *Igf2*<sup>AGGCT</sup> myotubes,  
258 and down-regulated in ZBED6-OE differentiated cells (Figure 5D). Activation of the PI3K  
259 pathway and its downstream targets plays a central role in myogenesis. Interestingly, *Prkaa2*,  
260 *Prkab2* and *Prkag3*, all up-regulated in *Zbed6*<sup>-/-</sup> and *Igf2*<sup>AGGCT</sup> myotubes, encode the  $\alpha$ 2,  $\beta$ 2 and  
261  $\gamma$ 3 subunits. These subunits form a specific isoform of AMPK that shows tissue-specific  
262 expression in white skeletal muscle (Barnes et al., 2004). The results imply that the interaction  
263 between ZBED6-*Igf2* has an essential role in muscle development and influences muscle  
264 metabolism.

265

266 **Over-expression of ZBED6 in non-differentiated C2C12 cells results in reduced cell**  
267 **viability and cell cycle arrest**

268 Since deletion of ZBED6 promotes cell proliferation and myogenesis, we investigated whether  
269 over-expression of ZBED6 causes the opposite effect. Unfortunately, we did not succeed in our  
270 attempts to establish a stable myoblast cell line overexpressing ZBED6 suggesting that  
271 overexpression may be lethal in C2C12 cells, which is consistent with the results of a previous  
272 study (Butter et al., 2010). Therefore, we measured cell viability after transient overexpression of  
273 ZBED6 (ZBED6-OE) in C2C12 cells. We found a significant reduction in cell viability in  
274 ZBED6-OE cells in comparison to control cells (Figure S5). The cell apoptosis analysis using  
275 flow cytometry revealed a significant reduction in the number of live cells in ZBED6-OE (Figure  
276 6A). Moreover, cell cycle analysis using flow cytometry displayed a significant difference in the  
277 proportion of cells in different cell cycle phases, in which 82% of ZBED6-OE cells appeared to  
278 be in G0/G1 phase and 10% in S-phase, whereas the corresponding proportions in control cells  
279 were 58% and 35%, respectively (Figure 6B). These phenotypic changes in ZBED6-OE  
280 myoblasts were in complete agreement with the RNA-seq analysis that revealed a significant  
281 enrichment of genes involved in cell cycle and cell division processes among the down-regulated  
282 genes after ZBED6-OE in proliferating myoblasts (Table 2). Out of 98 down-regulated cell  
283 cycle-related genes, 21 were previously identified as putative direct targets of ZBED6 (Jiang et  
284 al., 2014; Markljung et al., 2009) (Figure 6C). Some of the putative direct targets with essential  
285 role in cell cycle regulation were validated by qPCR (Figure S6). These included the genes for  
286 E2f1 and E2f2, members of the E2f family that has an essential role in regulating cell  
287 proliferation and controls the transition from G1 to S phase (Wu et al., 2001). There was a

288 striking upregulation of genes involved in immune defense after ZBED6-OE in proliferating  
289 myoblasts (Table 2). These results suggest that ZBED6 inhibits proliferation and promotes  
290 immune defense in C2C12 cells.

291

### 292 **Changes in mitochondrial activity in response to altered ZBED6 expression in myoblasts**

293 The strong correlation between mitochondrial biogenesis and aerobic metabolism, on one hand,  
294 and mesenchymal stem cell differentiation, on the other, is well established (Antico Arciuch et  
295 al., 2012; Duguez et al., 2004; Hsu et al., 2016). The marked increase in mitochondrial activity  
296 that occurs during mesenchymal differentiation is driven by the transcription factor PGC-1 $\alpha$ , and  
297 IGF2 has been suggested to participate in this process (Lee et al., 2015). Moreover, RNA-seq  
298 and SILAC proteomic analyses showed a significant enrichment for mitochondrial membrane  
299 proteins among DE proteins in *Zbed6*<sup>-/-</sup> myoblasts (Figure 3C). These observations encouraged  
300 us to look closer at mitochondrial activities in response to ZBED6-overexpression or ablation.  
301 Flow cytometry analysis of MitoTracker Red intensity, a dye that labels active mitochondria in  
302 living cells, indicated a significant reduction in mitochondrial mass in ZBED6-OE cells and an  
303 increase in mitochondria in *Zbed6*<sup>-/-</sup> cells, while no change was observed in *Igf2*<sup>AGGCT</sup> cells  
304 (Figure 6D and 6E). As MitoTracker Red labeling only gives a very crude estimate of  
305 mitochondrial mass and activity, we also stained transiently ZBED6-GFP transfected C2C12  
306 cells with JC-1, a probe that gives an estimate of the inner mitochondrial membrane potential.  
307 These experiments demonstrated that ZBED6-GFP overexpressing cells displayed lower JC-1  
308 aggregates (red fluorescence) to JC-1 monomers (green fluorescence) ratio (Figure 6F and 6G),  
309 indicating a decreased mitochondrial membrane potential in response to overexpressed ZBED6.  
310 Both the MitoTracker and JC-1 experiments are in agreement with the SILAC data, and suggest

311 an inhibitory role of ZBED6 on mitochondrial mass/function. Since both *Zbed6*<sup>-/-</sup> and *Igf2*<sup>AGGCT</sup>  
312 myoblasts exhibited similar phenotypic characteristics regarding growth and differentiation, we  
313 explored another part of mitochondrial function in these cells. We analyzed C2C12 cell  
314 mitochondrial oxidation rates (OCR) using the Seahorse technique (Malmgren et al., 2009). The  
315 OCR and extracellular acidification rate (ECAR) assay revealed an increased OCR (Figure 6H,  
316 left) and reduced ECAR in *Zbed6*<sup>-/-</sup> and *Igf2*<sup>AGGCT</sup> myoblasts (Figure 6H, right) compared to WT  
317 cells. OCR and ECAR were unaffected in ZBED6-OE cells (Figure 6H). As both *Zbed6*<sup>-/-</sup> and  
318 *Igf2*<sup>AGGCT</sup> myoblasts show increased *Igf2* expression, we hypothesized that the increase in  
319 respiration might be an IGF2 effect. To test this hypothesis, we treated cells with recombinant  
320 IGF2 and measured the OCR and ECAR dose-response in C2C12 WT cells. We found a 2-fold  
321 increase in respiration rates at the higher IGF2 concentrations (20 and 40 ng/ml IGF2) (Figure 6I,  
322 left), while no changes were detected in the extracellular acidification rates (Figure 6I, right).  
323 Thus, it appears that ZBED6 controls myoblast mitochondrial biogenesis/activity partially via  
324 IGF2.

325

## 326 **DISCUSSION**

327 This study conclusively demonstrates that the interaction between ZBED6 and its binding site in  
328 *Igf2* plays a critical role in regulating the development of myogenic cells. This conclusion is  
329 based on (i) MS quantitative proteomics and transcriptomic analyses, (ii) the altered growth rate  
330 of myoblasts, (iii) effects on myotube formation and maturation, and (iv) assessment of  
331 mitochondrial activities. Interestingly, the disruption of the ZBED6 binding site in *Igf2* was  
332 sufficient to obtain very similar phenotypic effects as observed in the *Zbed6* knock out

333 demonstrating that the phenotypic effects caused by *Zbed6* inactivation in myoblast cells are  
334 largely mediated through the regulation of *Igf2* expression.

335 The initial development of skeletal muscle occurs prenatally and involves the  
336 proliferation of myoblasts, which then exit the cell cycle and start differentiation to form  
337 myotubes (Dunlison et al., 1999; Stockdale, 1992). It has been reported that the number of  
338 myoblasts prenatally greatly influences muscle growth postnatally since the number of muscle  
339 fibers are fixed at birth (Rehfeldt et al., 1993; Velloso, 2008). This is of particular interest, since  
340 ZBED6 inactivation or disruption of the interaction between ZBED6 and the binding site in *Igf2*  
341 promotes the proliferation and growth of myoblasts (Figure 1E, F). The *Zbed6*<sup>-/-</sup> and *Igf2*<sup>AGGCT</sup>  
342 myoblasts had a ~30-fold up-regulation in *Igf2* mRNA expression. This massive increase in *Igf2*  
343 expression was rescued towards the levels found in WT cells when ZBED6 was reintroduced in  
344 *Zbed6*<sup>-/-</sup> myoblasts, while no changes were observed in case of *Igf2*<sup>AGGCT</sup> myoblasts. Thus,  
345 ZBED6 represses *Igf2* expression through the binding site located in *Igf2* intron 1.

346 Our results on myoblast differentiation revealed that *Zbed6*<sup>-/-</sup> and *Igf2*<sup>AGGCT</sup> myoblasts  
347 were prone to develop mature, hypertrophic and contractile myotubes, with a striking increase in  
348 the expression of well-known markers of muscle differentiation, *Igf2*, myogenin and myosin  
349 heavy chain (MyHC). In contrast, over-expression of ZBED6 blocked the differentiation of  
350 myoblasts, and the expression of *Igf2*, myogenin and MyHC were greatly down-regulated. These  
351 phenotypic changes are in agreement with our transcriptome data that revealed a significant  
352 ~30% overlap between differentially expressed genes in *Zbed6*<sup>-/-</sup> and *Igf2*<sup>AGGCT</sup> myotubes (Figure  
353 4A). Gene ontology analysis of the up-regulated genes in common between *Zbed6*<sup>-/-</sup> and  
354 *Igf2*<sup>AGGCT</sup> myotubes demonstrated a significant enrichment of muscle-specific categories,  
355 including genes encoding myosin heavy and light chains, troponins, titin, myomesins, alpha



356 actinin, leiomodulin, and myoglobin. Interestingly, ~40% of the up-regulated DE genes in *Zbed6*<sup>-/-</sup>  
357 myotubes were found to be down-regulated in differentiated C2C12 cells after overexpressing  
358 ZBED6. The GO analysis of those genes showed an enrichment in muscle-specific categories  
359 very similar to what we found among up-regulated genes in *Zbed6*<sup>-/-</sup> myotubes.

360 SILAC quantitative proteomic analysis of mutant myoblasts revealed a significant  
361 enrichment of mitochondrial membrane proteins exclusively among the DE proteins found in  
362 *Zbed6*<sup>-/-</sup> but not *Igf2*<sup>AGGCT</sup> myoblast (Figure 3C). This observation was confirmed by the  
363 decreased mitochondrial membrane potential in response to ZBED6 overexpression (Figure 6D-  
364 G). However, the assessment of mitochondrial respiration rate indicated a positive correlation  
365 between oxygen consumption rate and the amount of IGF2 protein in myoblasts. This was  
366 concluded by the consistent changes in oxygen consumption in *Zbed6*<sup>-/-</sup> and *Igf2*<sup>AGGCT</sup> myoblasts,  
367 and after the addition of recombinant IGF2 to the growth medium of wild-type myoblasts. Our  
368 findings fit well with what has been reported in literature about the essential role of  
369 mitochondrial activities in proliferation and differentiation of myoblasts. For instance,  
370 respiration-deficient human myoblasts were growing slower than control cells, exhibited low  
371 ATP synthesis and demonstrated severe deficiency in myotube formation (Herzberg et al., 1993).  
372 Furthermore, it has been indicated that the basal mitochondrial respiration rate was increased  
373 one-fold and the maximal respiration increased four-fold in differentiated myotubes (Remels et  
374 al., 2010).

375 We have previously reported that ZBED6 has ~2,500 binding sites all over the genome  
376 (Jiang et al., 2014; Markljung et al., 2009). Here we find that the disruption of only one of these  
377 binding sites, located in *Igf2* intron 1, resulted in similar phenotypic changes as observed by  
378 complete inactivation of *Zbed6* in C2C12 cells. The results suggest that the regulation of IGF2

379 expression may be the most important role of ZBED6 in skeletal muscle cells, which is  
380 consistent with the initial observation that a mutation of this binding site is causing an altered  
381 body composition in pigs selected for meat production (Van Laere et al., 2003) and our recent  
382 characterization of *Zbed6*<sup>-/-</sup> and *Igf2* knock-in mice (Younis et al., 2018b). However, ZBED6 is  
383 essentially found in all cell types and throughout development, so it may interact with other  
384 important targets in other cells or during other stages of development.

385 In summary, we have shown that the up-regulation of *Igf2* expression obtained either by  
386 ZBED6 ablation or the deletion of its binding site in intron one of *Igf2*, has an essential role in  
387 modulating the metabolism of myogenic cells and promotes differentiation of myoblast cells  
388 partially through increasing respiration rate of the mitochondria. This study suggests that the  
389 interaction between ZBED6-*Igf2* may be an important therapeutic target for human diseases  
390 where anabolism is impaired.

391

## 392 **METHODS**

393

394 **Cell culture.** Mouse myoblast C2C12 cells were obtained from ATCC (CRL-1772), and it is a  
395 subclone of the previously established mouse myoblast cell line (Yaffe and Saxel, 1977). The  
396 cells were maintained in Dulbecco's Modified Eagle Medium (DMEM) with 2 mM L-glutamine,  
397 1 mM sodium pyruvate and 4.5 g/L glucose (ATCC 30-2001), supplemented with 10% (v/v)  
398 heat-inactivated fetal bovine serum (FBS) and penicillin (0.2 U/mL)/streptomycin (0.2 µg/ml)/L-  
399 glutamine (0.2 µg/ml) (Gibco) at 37°C in a 5% CO<sub>2</sub> humidified atmosphere. Differentiation was  
400 induced by replacing FBS with 2% horse serum (Gibco). The differentiation medium was

401 changed every 48h. The differentiated myotubes were collected by adding 0.05% Trypsin-EDTA  
402 (Gibco) for 1 min at 37°C, which was sufficient to detach the mature myotubes from the plate.

403  
404 **Genome editing.** The coding sequence of *Zbed6* and its binding site in *Igf2* were targeted in  
405 C2C12 cells using CRISPR/Cas9 tools. Two specific guide RNAs (gRNA) for *Zbed6* and one for  
406 *Igf2* were designed using the CRISPRdirect tools (Naito et al., 2015). The gRNAs sequences  
407 were cloned into the Cas9 expressing plasmid pSpCas9(BB)-2A-GFP (PX458), (Addgene  
408 plasmid #48138) and co-transfected with linear hygromycin marker (Clontech) into C2C12 cells  
409 at passage number 5. Wild-type cells were transfected with empty pSpCas9(BB)-2A-GFP  
410 plasmid and linear hygromycin. Transfected cells were kept under selective medium for two  
411 weeks. Single-cell clones were screened for a 2.5 kb deletion in *Zbed6* using primers flanking the  
412 targeted site (Figure 1A). The *Igf2* targeted clones were screened using primers flanking the  
413 targeted site, followed by Sanger sequencing of individual clones.

414  
415 **Immunofluorescence staining.** Cells were cultured in an 8-well slide chamber (BD Falcon)  
416 overnight to around 60–70% confluence. The cells were washed with PBS and fixed with 4%  
417 (v/v) paraformaldehyde for 10 min at room temperature. The fixed cells were permeabilized with  
418 0.25% (v/v) Triton X-100 and then blocked for non-specific binding with 2% (w/v) BSA in PBS.  
419 The primary antibodies for myogenin and myosin heavy chain (Santa Cruz Biotechnology) were  
420 diluted 1:500 in PBS containing 1% (w/v) BSA and incubated with the cells overnight. Cells  
421 were washed three times with PBS and then incubated with Alexa Flour-labeled secondary  
422 antibodies. DAPI was used as counter staining. Slides were analyzed using a confocal  
423 microscope (Zeiss LSM 700).

424

425 **Real-time quantitative PCR.** Total RNA was extracted from cells using the RNeasy Mini kit  
426 (Qiagen), including the DNase I treatment. The High Capacity cDNA Reverse Transcription Kit  
427 (Applied Biosystems) was used to generate cDNA from the extracted RNA. Quantitative PCR  
428 (qPCR) analysis was performed using ABI MicroAmp Optical 384-well Reaction plates on an  
429 ABI 7900 real-time PCR instrument (Applied Biosystems). The qPCR was performed using  
430 TaqMan Gene Expression Assays that consisted of forward and reverse primers with TaqMan  
431 minor groove binder (MGB) probe for each gene (*Zbed6*: Mm04178798\_s1, *Igf2*:  
432 Mm00439564\_m1, *18S*: Mm03928990\_g1, Applied Biosystems); *18S* and was used as  
433 housekeeping gene. For *Myog* and the validated DE genes, the forward and reverse primers  
434 (Tables S6) were mixed with SYBR Green Gene Expression Master Mix (Applied Biosystems)  
435 in 10  $\mu$ l total reaction volume.

436

437 **Immunoblot analysis.** Total protein lysates were prepared using RIPA lysis buffer containing  
438 protease inhibitors (Complete Ultra Tablets, Roche). Equal amounts of total lysates were  
439 separated by SDS-PAGE (4–15%, Bio-Rad) and transferred to PVDF membranes (Millipore).  
440 StartingBlock buffer (Thermo Scientific) was used to block the membrane before the primary  
441 anti-ZBED6 antibody (1:1000) was added (Akhtar et al., 2015). Proteins were visualized and  
442 detected by the Odyssey system (LI-COR).

443

444 **Stable Isotope Labeling with Amino acids in Cell culture (SILAC).** C2C12 cells were  
445 cultured in Dulbecco's modified Eagle's medium (DMEM) for SILAC (Thermo Fisher Scientific)  
446 supplemented with 10% dialyzed fetal bovine serum (FBS, MWCO 10 kDa; Thermo Fisher

447 Scientific), 100 U/mL penicillin (Thermo Fisher Scientific), 100 µg/mL streptomycin (Thermo  
448 Fisher Scientific), 0.25 µg/mL amphotericin B (Thermo Fisher Scientific) and light isotopic  
449 labels L-arginine-HCl and L-lysine-2 HCl or heavy isotopic labels <sup>13</sup>C<sub>6</sub>, <sup>15</sup>N<sub>4</sub> L-arginine-HCl  
450 (Arg-10) and <sup>13</sup>C<sub>6</sub>, <sup>15</sup>N<sub>2</sub> L-lysine-2 HCl (Lys-8) (Thermo Fisher Scientific). Cells were kept in a  
451 humidified atmosphere with 5% CO<sub>2</sub> at 37°C. To avoid contamination of light amino acids, sub-  
452 culturing was performed using Cell dissociation buffer (Thermo Fisher Scientific) instead of  
453 trypsin. Isotopic incorporation was checked using a script in R as previously described (Stöhr  
454 and Tebbe, 2011) after approximately five cell divisions to confirm complete (>95%) labeling.  
455 Arginine-to-proline conversion was assessed by calculating the percentage of heavy proline (Pro-  
456 6) containing peptides among all identified peptides, and kept at <5%. Confluent (~80%) cells  
457 were washed five times in PBS, and incubated 12 h in serum-free medium. Medium was  
458 collected, centrifuged and filtered through a 0.2 µm filter. Protein concentration was measured  
459 with a Coomassie (Bradford) assay kit (Thermo Fisher Scientific). Cells were harvested and  
460 lysates prepared using M-PER mammalian protein extraction reagent (Thermo Fisher Scientific),  
461 and protein concentration was measured using a bicinchoninic acid (BCA) protein assay kit  
462 (Thermo Fisher Scientific). Heavy and light cell lysates or media (40 µg each of cell lysate, 170  
463 µg each of medium) were mixed 1:1. Mixed media were subsequently concentrated through spin  
464 columns with a cutoff of 3 kDa (Vivaspin, Sartorius). Mixed proteins were separated on a 4-20%  
465 Mini-PROTEAN TGX precast gel (Bio-Rad, Hercules, CA). Each gel lane was cut into ten  
466 separate pieces, and proteins were reduced in-gel with 10 mM DTT in 25 mM NH<sub>4</sub>HCO<sub>3</sub>,  
467 thereafter alkylated with 55 mM iodoacetamide in 25 mM NH<sub>4</sub>HCO<sub>3</sub>, and finally digested with  
468 17 ng/µl sequencing-grade trypsin (Promega) in 25 mM NH<sub>4</sub>HCO<sub>3</sub> using a slightly modified in-  
469 gel digestion protocol (Shevchenko et al., 1996). The produced peptides were eluted from the gel

470 pieces using 1% (v/v) formic acid (FA) in 60% (v/v) acetonitrile, dried down in a vacuum  
471 centrifuge (ThermoSavant SPD SpeedVac, Thermo Scientific), and finally dissolved in 1% (v/v)  
472 FA. The experiments were run in triplicates, of which one was reciprocal (reverse labeling).

473

474 **Liquid chromatography and mass spectrometry.** Peptide samples were desalted using Stage  
475 Tips (Thermo Fisher Scientific) according to the manufacturer's protocol, and subsequently  
476 dissolved in 0.1% (v/v) FA. Samples were separated by RP-HPLC using a Thermo Scientific  
477 nLC-1000 with a two-column setup; an Acclaim PepMap 100 (2 cm x 75  $\mu$ m, 3  $\mu$ m particles,  
478 Thermo Fisher Scientific) pre-column was connected in front of an EASY-Spray PepMap RSLC  
479 C18 reversed phase column (50 cm x 75  $\mu$ m, 2  $\mu$ m particles, Thermo Fisher Scientific) heated to  
480 35°C, running solvent A (H<sub>2</sub>O and 0.1% (v/v) FA). A gradient of 2–40% solvent B (acetonitrile  
481 and 0.1% (v/v) FA) was run at 250 nL/min over a period of 3 h. The eluted peptides were  
482 analyzed on a Thermo Scientific Orbitrap Fusion Tribrid mass spectrometer, operated at a Top  
483 Speed data-dependent acquisition scan mode, ion-transfer tube temperature of 275°C, and a  
484 spray voltage of 2.4 kV. Full scan MS spectra (m/z 400 – 2000) were acquired in profile mode at  
485 a resolution of 120,000 at m/z 200, and analyzed in the Orbitrap with an automatic gain control  
486 (AGC) target of 2.0e5 and a maximum injection time of 100 ms. Ions with an intensity above  
487 5.0e3 were selected for collision-induced dissociation (CID) fragmentation in the linear ion trap  
488 at a collision energy of 30%. The linear ion trap AGC target was set at 1.0e4 with a maximum  
489 injection time of 40 ms, and data was collected at centroid mode. Dynamic exclusion was set at  
490 60 s after the first MS1 of the peptide. The system was controlled by Xcalibur software (version  
491 3.0.63.3, Thermo Scientific). Instrument quality control was monitored using the Promega 6x5

492 LC-MS/MS Peptide Reference Mix (Promega) before and after each MS experiment run, and  
493 analyzed using PReMiS software (version 1.0.5.1, Promega).

494

495 **Mass spectrometric data analysis.** Data analysis of raw files was performed using MaxQuant  
496 software (version 1.5.6.5) and the Andromeda search engine (Cox and Mann, 2008; Tyanova et  
497 al., 2016), with cysteine carbamidomethylation as a static modification and Arg-10, Lys-8,  
498 methionine oxidation and protein N-terminal acetylation as variable modifications. First search  
499 peptide MS1 Orbitrap tolerance was set to 20 ppm. Iontrap MS/MS tolerance was set to 0.5 Da.  
500 The re-quantify option was enabled to get ratios where only one isotope pattern was found.  
501 Match between runs was also enabled, to identify peptides where only MS1 data was available.  
502 Minimum label ratio count was set to 2, and the advanced ratio estimation option was enabled.  
503 Peak lists were searched against the UniProtKB/Swiss-Prot *Mus musculus* proteome database  
504 (UP000000589, version 2016-01-12) with a maximum of two trypsin miscleavages per peptide.  
505 The contaminants database of MaxQuant was also utilized. A decoy search was made against the  
506 reversed database, where the peptide and protein false discovery rates were both set to 1%. Only  
507 proteins identified with at least two peptides of at least 7 amino acids in length were considered  
508 reliable. The peptide output from MaxQuant was filtered by removing reverse database hits,  
509 potential contaminants and proteins only identified by site (PTMs). Intensity values were first  
510 normalized using variance stabilization method, adjusted for batch effect and fitted to linear  
511 model (Huber et al., 2002; Ritchie et al., 2015). The empirical Bayes moderated t-statistics and  
512 their associated *P*-values were used to calculate the significance of DE proteins (Smyth, 2004).  
513 The *P*-values were corrected for multiple testing using the Benjamini–Hochberg procedures  
514 (Benjamini and Hochberg, 1995).

515  
516 **RNA sequencing.** Myoblasts or the collected myotubes were washed in PBS and total RNA was  
517 extracted using the RNeasy Mini kit (QIAGEN). The RNA quality and integrity was measured  
518 with a RNA ScreenTape assay (TapeStation, Agilent Technologies). Strand-specific, 3' end  
519 mRNA sequencing libraries were generated using QuantSeq 3' mRNA-Seq Library Prep Kit  
520 (Lexogen) following the manufacturer's instructions. For each sample, 2 µg of total RNA were  
521 poly-A selected using oligo-dT beads to enrich for mRNA, and the RNA-seq libraries were  
522 amplified by 12 PCR cycles. The libraries were size-selected for an average insert size of 150 bp  
523 and sequenced as 50 bp paired-end reads using Illumina HiSeq. Sequence reads were mapped to  
524 the reference mouse genome (mm10) using STAR 2.5.1b with default parameters (Dobin et al.,  
525 2013). HTSeq-0.6.1 (Python Package) (Anders et al., 2015) was used to generate read counts and  
526 edgeR (Bioconductor package) (Robinson et al., 2009) was used to identify differentially  
527 expressed (DE) genes using gene models for mm10 downloaded from UCSC  
528 ([www.genome.ucsc.edu](http://www.genome.ucsc.edu)). The abundance of gene expression was calculated as count-per-million  
529 (CPM) reads. Genes with less than one CPM in at least three samples were filtered out. The  
530 filtered libraries were normalized using the trimmed mean of M-values (TMM) normalization  
531 method (Robinson and Oshlack, 2010). P-values were corrected for multiple testing using the  
532 False Discovery Rate (FDR) approach. The DE genes were submitted to The Database for  
533 Annotation, Visualization and Integrated Discovery (DAVID, v6.8) (Huang et al., 2008) for gene  
534 ontology analysis. All expressed genes in C2C12 cells were used as background, and the  
535 Biological Process and KEGG pathway tables were used to identify enriched GO terms.  
536



537 **Cell growth measurements.** WT cells at different passages (P5, P12 and P12), WT cells  
538 transfected with the Cas9 plasmid (WT-Cas9), two *Zbed6*<sup>-/-</sup> and two *Igf2*-mutant clones were  
539 seeded in 24-well plates (10,000 cells per well) in growth media, and were cultured for 6 days  
540 with real-time measurement of cell density every 12 h using an IncuCyte instrument (Essen  
541 Bioscience). The experiments were carried out using biological triplicates of each cell line.

542

543 **Cell viability assay.** Cells were seeded in 24-well plates (30,000 cells/well) and let to attach. A  
544 day after, the cells were transfected with GFP (control) or ZBED6-GFP overexpressing  
545 constructs (ZBED6-OE). At 24 h post transfection, the cells were incubated with growth media  
546 containing 10% (v/v) PrestoBlue (Invitrogen). The reduction of PrestoBlue reagent was  
547 measured on a Tecan Sunrise Plate Reader at four time points post incubation (10 min, 30 min, 2  
548 h and 4 h), with the following parameters: bottom-read fluorescence (excitation 560 nm,  
549 emission 590 nm).

550

551 **Cell cycle.** C2C12 cells transiently expressing ZBED6-GFP or GFP were analyzed for cell cycle  
552 profile using Click-iT EdU flow cytometry assay kit (Invitrogen) and FxCycle™ violet stain  
553 (Invitrogen) for total DNA staining. Cells were incubated with EdU for 2 h according to the  
554 manufacturer's instructions before fixation and DNA staining. Cells were analyzed on LSR  
555 Fortessa (BD Biosciences), and results were analyzed using the FACSDiva software (BD  
556 Biosciences).

557

558 **Cell apoptosis.** C2C12 cells were harvested and fixed with 4% PFA (not permeabilized), and  
559 controls were fixed and permeabilized with Cytofix/Cytoperm solution (BD Biosciences) before

560 staining with V450-Annexin-V (BDBiosciences) and/or DRAQ7 (Biostatus). Cells were stained  
561 with V450-Annexin-V and DRAQ7 according to the manufacturer's protocol. Cells were  
562 incubated for 15-30 min at RT in dark. Samples were analyzed on BD LSRFortessa flow  
563 cytometer using BD FACSDiva software. Viable cells were Annexin-V negative and DRAQ7  
564 negative (AnnV-, PI-) staining, while cells in early apoptosis were Annexin-V positive and  
565 DRAQ7 negative. Cells in late-apoptosis/necrosis were Annexin-V positive and DRAQ7 positive.

566  
567 **MitoTracker Red and JC-1 staining.** C2C12 cells were stained for active mitochondria by  
568 50nM MitoTracker Red FM (Invitrogen) for 30 min. After washing, the cells were either fixed  
569 for confocal imaging by a Zeiss 780 confocal microscope or directly examined for MitoTracker  
570 Red intensity using a FACSCalibur flow cytometer (BD Biosciences). Mitochondrial membrane  
571 potential of C2C12 cells was semiquantitatively determined by the fluorescent probe JC-1 (4  
572  $\mu$ M, 30 min incubation, Sigma-Aldrich). After careful washing, the cells were imaged by  
573 confocal microscope and the fluorescence of JC-1 aggregates at hyperpolarized membrane  
574 potential (585 nm) was quantified by Image J.

575  
576 **Oxygen consumption and extracellular acidification rates.** The oxygen consumption rate  
577 (OCR) and extracellular acidification rate (ECAR) were determined using the Extracellular Flux  
578 Analyzer XF<sup>c</sup>96 (Seahorse Bioscience). Cells were cultured in 96-well plates (Seahorse  
579 Biosciences) in normal culture medium for 24-48 h. After culture, assays were performed in XF  
580 assay medium (Seahorse Biosciences) set to pH 7.4 and supplemented with 25 mM glucose.  
581 OCR and ECAR were measured during the last 30 min of the 1 h incubation in XF assay  
582 medium, which was followed by the injection of inhibitors of electron transport chain, 5  $\mu$ mol/l  
583 rotenone and 5  $\mu$ mol/l antimycin A, to inhibit the mitochondrial respiration. The remaining OCR

584 was considered as non-mitochondrial respiration. To calculate the mitochondrial respiration,  
585 non-mitochondrial OCR was subtracted from the total OCR. Data were normalized to cell  
586 number in the wells and presented as pmol/min/10,000 cells. Recombinant mouse IGF2 (R&D  
587 Systems, MN, USA), 5-40 ng/ml was supplemented to culture medium for 24 h before  
588 measurement.

589  
590 **ACKNOWLEDGMENTS.** We thank Aris Moustakas for valuable comments on the  
591 **manuscript.** The work was funded by grants from The Knut and Alice Wallenberg Foundation  
592 and Swedish Research Council. Sequencing was performed by the SNP&SEQ Technology  
593 Platform, supported by Uppsala University and Hospital, SciLifeLab and Swedish Research  
594 Council (80576801 and 70374401). Computer resources were provided by UPPMAX, Uppsala  
595 University.

596  
597 **AUTHOR CONTRIBUTIONS.** LA and NW conceived the study. SY was responsible for gene  
598 editing and most of the characterization of the different cell lines including RNAseq and  
599 bioinformatics analysis. SY, XC and ML conducted the SILAC proteomics of the cell lines. RN  
600 carried out qPCR validation, cell cycle and apoptosis analysis. XW, ES, PB and NW were  
601 responsible for the characterization of mitochondrial function. SY and LA wrote the paper with  
602 input from other authors. All authors approved the manuscript before submission.

603  
604 **REFERENCES**  
605 Akhtar, M., Younis, S., Wallerman, O., Gupta, R., Andersson, L., and Sjöblom, T. (2015). Transcriptional  
606 modulator ZBED6 affects cell cycle and growth of human colorectal cancer cells. *Proc. Natl. Acad. Sci.* *112*, 7743–  
607 7748.

608 Anders, S., Pyl, P.T., and Huber, W. (2015). HTSeq-A Python framework to work with high-throughput sequencing  
609 data. *Bioinformatics* 31, 166–169.

610 Antico Arciuch, V.G., Elguero, M.E., Poderoso, J.J., and Carreras, M.C. (2012). Mitochondrial Regulation of Cell  
611 Cycle and Proliferation. *Antioxid. Redox Signal.* 16, 1150–1180.

612 Barnes, B.R., Marklund, S., Steiler, T.L., Walter, M., Hjälml, G., Amarger, V., Mahlapuu, M., Leng, Y., Johansson,  
613 C., Galuska, D., et al. (2004). The 5'-AMP-activated protein kinase  $\gamma$ 3 isoform has a key role in carbohydrate and  
614 lipid metabolism in glycolytic skeletal muscle. *J. Biol. Chem.* 279, 38441–38447.

615 Benjamini, Y., and Hochberg, Y. (1995). Controlling the False Discovery Rate: A Practical and Powerful Approach  
616 to Multiple Testing. *J. R. Stat. Soc. Ser. B* 57, 289–300.

617 Butter, F., Kappei, D., Buchholz, F., Vermeulen, M., and Mann, M. (2010). A domesticated transposon mediates the  
618 effects of a single-nucleotide polymorphism responsible for enhanced muscle growth. *EMBO Rep* 11, 305–311.

619 Cox, J., and Mann, M. (2008). MaxQuant enables high peptide identification rates, individualized p.p.b.-range mass  
620 accuracies and proteome-wide protein quantification. *Nat. Biotechnol.* 26, 1367–1372.

621 Dobin, A., Davis, C.A., Schlesinger, F., Drenkow, J., Zaleski, C., Jha, S., Batut, P., Chaisson, M., and Gingeras,  
622 T.R. (2013). STAR: Ultrafast universal RNA-seq aligner. *Bioinformatics* 29, 15–21.

623 Duguez, S., Sabido, O., and Freyssenet, D. (2004). Mitochondrial-dependent regulation of myoblast proliferation.  
624 *Exp. Cell Res.* 299, 27–35.

625 Duglison, G.F., Scotting, P.J., and Wigmore, P.M. (1999). Rat embryonic myoblasts are restricted to forming  
626 primary fibres while later myogenic populations are pluripotent. *Mech. Dev.* 87, 11–19.

627 Filigheddu, N., Gnocchi, V.F., Coscia, M., Cappelli, M., Porporato, P.E., Taulli, R., Traini, S., Baldanzi, G.,  
628 Chianale, F., Cutrupi, S., et al. (2007). Ghrelin and des-acyl ghrelin promote differentiation and fusion of C2C12  
629 skeletal muscle cells. *Mol. Biol. Cell* 18, 986–994.

630 Florini, J.R., Magri, K.A., Ewton, D.Z., James, P.L., Grindstaff, K., Rotwein, P.S., Florinisg, J.R., Magris, K.A.,  
631 Ewtons, D.Z., Jamesni, P.L., et al. (1991). “Spontaneous” differentiation of skeletal myoblasts is dependent upon  
632 autocrine secretion of insulin-like growth factor-II. *J. Biol. Chem.* 266, 15917–15923.

633 Herzberg, N.H., Zwart, R., Wolterman, R.A., Ruiter, J.P.N., Wanders, R.J.A., Bolhuis, P.A., and van den Bogert, C.  
634 (1993). Differentiation and proliferation of respiration-deficient human myoblasts. *Biochim. Biophys. Acta - Mol.*  
635 *Basis Dis.* 1181, 63–67.

- 636 Hsu, Y.-C., Wu, Y.-T., Yu, T.-H., and Wei, Y.-H. (2016). Mitochondria in mesenchymal stem cell biology and cell  
637 therapy: From cellular differentiation to mitochondrial transfer. *Semin. Cell Dev. Biol.* 52, 119–131.
- 638 Huang, D.W., Sherman, B.T., and Lempicki, R.A. (2008). Systematic and integrative analysis of large gene lists  
639 using DAVID bioinformatics resources. *Nat. Protoc.* 4, 44–57.
- 640 Huber, W., Von Heydebreck, A., Sülthmann, H., Poustka, A., and Vingron, M. (2002). Variance stabilization applied  
641 to microarray data calibration and to the quantification of differential expression. In *Bioinformatics*, (Oxford  
642 University Press), pp. S96–S104.
- 643 Jiang, L., Wallerman, O., Younis, S., Rubin, C.-J.C.J., Gilbert, E.R.E.R., Sundström, E., Ghazal, A., Zhang, X.,  
644 Wang, L.L., Mikkelsen, T.S.T.S., et al. (2014). ZBED6 modulates the transcription of myogenic genes in mouse  
645 myoblast cells. *PLoS One* 9, e94187.
- 646 Jinek, M., Chylinski, K., Fonfara, I., Hauer, M., Doudna, J.A., and Charpentier, E. (2012). A programmable dual-  
647 RNA-guided DNA endonuclease in adaptive bacterial immunity. *Science* (80-. ). 337, 816–821.
- 648 Van Laere, A.-S., Nguyen, M., Braunschweig, M., Nezer, C., Collette, C., Moreau, L., Archibald, A.L., Haley, C.S.,  
649 Buys, N., Tally, M., et al. (2003). A regulatory mutation in IGF2 causes a major QTL effect on muscle growth in the  
650 pig. *Nature* 425, 832–836.
- 651 Lee, K.Y., Singh, M.K., Ussar, S., Wetzel, P., Hirshman, M.F., Goodyear, L.J., Kispert, A., and Kahn, C.R. (2015).  
652 Tbx15 controls skeletal muscle fibre-type determination and muscle metabolism. *Nat. Commun.* 6, 8054.
- 653 Malmgren, S., Nicholls, D.G., Taneera, J., Bacos, K., Koeck, T., Tamaddon, A., Wibom, R., Groop, L., Ling, C.,  
654 Mulder, H., et al. (2009). Tight coupling between glucose and mitochondrial metabolism in clonal  $\beta$ -cells is required  
655 for robust insulin secretion. *J. Biol. Chem.* 284, 32395–32404.
- 656 Markljung, E., Jiang, L., Jaffe, J.D., Mikkelsen, T.S., Wallerman, O., Larhammar, M., Zhang, X., Wang, L., Saenz-  
657 Vash, V., Gnirke, A., et al. (2009). ZBED6, a novel transcription factor derived from a domesticated DNA  
658 transposon regulates IGF2 expression and muscle growth. *PLoS Biol* 7, e1000256.
- 659 Naito, Y., Hino, K., Bono, H., and Ui-Tei, K. (2015). CRISPRdirect: Software for designing CRISPR/Cas guide  
660 RNA with reduced off-target sites. *Bioinformatics* 31, 1120–1123.
- 661 Ran, F.A., Hsu, P.D., Wright, J., Agarwala, V., Scott, D.A., and Zhang, F. (2013). Genome engineering using the  
662 CRISPR-Cas9 system. *Nat. Protoc.* 8, 2281–2308.
- 663 Rehfeldt, C., Fiedler, I., Weikard, R., Kanitz, E., and Ender, K. (1993). It is possible to increase skeletal muscle fibre

664 number in utero. *Biosci. Rep.* *13*, 213–220.

665 Remels, A.H. V, Langen, R.C.J., Schrauwen, P., Schaart, G., Schols, A.M.W.J., and Gosker, H.R. (2010).

666 Regulation of mitochondrial biogenesis during myogenesis. *Mol. Cell. Endocrinol.* *315*, 113–120.

667 Ritchie, M.E., Phipson, B., Wu, D., Hu, Y., Law, C.W., Shi, W., and Smyth, G.K. (2015). Limma powers

668 differential expression analyses for RNA-sequencing and microarray studies. *Nucleic Acids Res.* *43*, e47.

669 Robinson, M.D., and Oshlack, A. (2010). A scaling normalization method for differential expression analysis of

670 RNA-seq data. *Genome Biol.* *11*, R25.

671 Robinson, M.D., McCarthy, D.J., and Smyth, G.K. (2009). edgeR: A Bioconductor package for differential

672 expression analysis of digital gene expression data. *Bioinformatics* *26*, 139–140.

673 Shevchenko, A., Wilm, M., Vorm, O., and Mann, M. (1996). Mass spectrometric sequencing of proteins from silver-

674 stained polyacrylamide gels. *Anal. Chem.* *68*, 850–858.

675 Smyth, G.K. (2004). Linear Models and Empirical Bayes Methods for Assessing Differential Expression in

676 Microarray Experiments. *Stat. Appl. Genet. Mol. Biol.* *3*, 1–25.

677 Stockdale, F.E. (1992). Myogenic cell lineages. *Dev. Biol.* *154*, 284–298.

678 Stöhr, G., and Tebbe, A. (2011). Chapter 8. Quantitative LC-MS of Proteins. pp. 104–122.

679 Tyanova, S., Temu, T., and Cox, J. (2016). The MaxQuant computational platform for mass spectrometry-based

680 shotgun proteomics. *Nat. Protoc.* *11*, 2301–2319.

681 Velloso, C.P. (2008). Regulation of muscle mass by growth hormone and IGF-I. *Br.J.Pharmacol.* *154*, 557–568.

682 Wang, X., Jiang, L., Wallerman, O., Younis, S., Yu, Q., Klaesson, A., Tengholm, A., Welsh, N., and Andersson, L.

683 (2018). ZBED6 negatively regulates insulin production, neuronal differentiation, and cell aggregation in MIN6 cells.

684 *FASEB J.* fj.201600835R.

685 Wu, L., Timmers, C., Maiti, B., Saavedra, H.I., Sang, L., Chong, G.T., Nuckolls, F., Giangrande, P., Wright, F.A.,

686 Field, S.J., et al. (2001). The E2F1–3 transcription factors are essential for cellular proliferation. *Nature* *414*, 457–

687 462.

688 Yaffe, D., and Saxel, O. (1977). Serial passaging and differentiation of myogenic cells isolated from dystrophic

689 mouse muscle. *Nature* *270*, 725–727.

690 Younis, S., Kamel, W., Falkeborn, T., Wang, H., Yu, D., Daniels, R., Essand, M., Hinkula, J., Akusjärvi, G., and

691 Andersson, L. (2018a). Multiple nuclear-replicating viruses require the stress-induced protein ZC3H11A for

692 efficient growth. *Proc. Natl. Acad. Sci. 115*, 201722333.

693 Younis, S., Schönke, M., Massart, J., Hjørtelberg, R., Sundström, E., Gustafson, U., Björnholm, M., Krook, A.,  
694 Frystyk, J., Zierath, J.R., et al. (2018b). The ZBED6-IGF2 axis has a major effect on growth of skeletal muscle and  
695 internal organs in placental mammals. *Proc. Natl. Acad. Sci. U. S. A. 115*, 201719278.

696

697

698 **FIGURE LEGENDS**

699

700 **Figure 1. Knock-out of *Zbed6* or its binding site in *Igf2* alter the growth of myoblasts.** (A)

701 Schematic description of *Zbed6* targeting using CRISPR/Cas9. Red scissors indicate the targeted

702 sites of *Zbed6* using two guide RNAs. Blue arrows indicate the location of the PCR primers that

703 were used for genotyping of the KO clones. (B) PCR screening of *Zbed6* KO clones. (C)

704 Schematic description of the targeted ZBED6 binding sequences in *Igf2* (bold). The scissor

705 indicates the cleavage site using specific gRNA sequences (yellow) adjacent to the PAM

706 sequences (blue). Black arrows indicate *Igf2* promoters, red boxes are the coding sequences of

707 *Igf2*. (D) Immunoblot validation of *Zbed6*<sup>-/-</sup> clones, the *Igf2*<sup>AGGCT</sup> clone and WT cells, NSB:

708 non-specific band. (E) Real-time measurements of cell growth (mean±SEM) of WT C2C12 cells

709 (black) and *Zbed6*<sup>-/-</sup> clones (red) (n=3). (F) Cell growth of two *Igf2*-mutant clones (red) and WT

710 cells (black). (G) Cell growth measurement of WT C2C12 cells at different passages (P5, P12

711 and P20) and WT cells transfected with Cas9 reagents without gRNA (WT Cas9). (H)

712 Immunoblot validation of ZBED6-GFP overexpression in C2C12 cells. (I) Quantitative PCR

713 analysis of *Zbed6* mRNA expression and after transient expression of GFP (Control) or ZBED6-

714 GFP (ZBED6-OE) constructs in myoblasts. (J) Quantitative PCR analysis of *Igf2* mRNA

715 expression after transient expression of ZBED6-GFP in WT cells, *Zbed6*<sup>-/-</sup> and *Igf2*<sup>AGGCT</sup> cells.

716 Graph shows the fold-changes (mean ± SEM) compared to WT control cells. ns=non significant,

717 \*\*P<0.01, \*\*\*P<0.001, Student's t-test.

718

719 **Figure 2. *Zbed6*<sup>-/-</sup> and *Igf2*<sup>AGGCT</sup> myoblasts develops hypertrophic myotubes.** (A)

720 Immunofluorescence staining of differentiated WT, *Zbed6*<sup>-/-</sup> and *Igf2*<sup>AGGCT</sup> myotubes using anti-



721 myogenin antibody (green), anti-myosin-heavy chain (MyHC) antibody (red) and DAPI (blue).  
722 (B) Differentiation index of WT, *Zbed6*<sup>-/-</sup> and *Igf2*<sup>AGGCT</sup> myotubes, calculated as the percentage  
723 of nuclei in myotubes to the total number of nuclei in the same field (Filigheddu et al., 2007). (C)  
724 The relative intensity of MyHC staining in the differentiated myotubes. (D) qPCR analysis of  
725 *Myogenin* expression in myotubes, the graph present the relative expression to WT myoblast  
726 (mean±SEM), \*\*P<0.01, \*\*\*P<0.001, Student's t-test.

727

728 **Figure 3. SILAC proteomic and transcriptome analyses of *Zbed6*<sup>-/-</sup> and *Igf2*<sup>AGGCT</sup>**  
729 **myoblasts.** (A) Expression of identified proteins and genes by SILAC and RNA-seq data in  
730 *Zbed6*<sup>-/-</sup> (left) and *Igf2*<sup>AGGCT</sup> (right) myoblasts. The values are presented as log fold change  
731 (logFC) to WT cells and colored based on the FDR<0.05 values. (B) Intersection of DE proteins  
732 in both *Zbed6*<sup>-/-</sup> and *Igf2*<sup>AGGCT</sup> myoblasts (left), KEGG pathway analysis of the shared 56 DE  
733 proteins (right). (C) GO analysis of the 325 DE proteins in *Zbed6*<sup>-/-</sup> myoblasts. GeneRatio  
734 indicates the number of genes found in each term as a proportion of the total number of  
735 examined genes. (D) Intersection of DE proteins in *Zbed6*<sup>-/-</sup> myoblasts and putative ZBED6  
736 targets that are expressed in C2C12 cells and detected by SILAC and RNA-seq (left), the fold  
737 changes of genes/proteins with ZBED6 binding sites (left). (E) GO analysis of up-regulated  
738 genes/proteins in *Zbed6*<sup>-/-</sup> myoblasts with ZBED6 binding sites.

739

740 **Figure 4. Transcriptome analysis of *Zbed6*<sup>-/-</sup> and *Igf2*<sup>AGGCT</sup> myotubes.** (A) Intersection of up-  
741 regulated and down-regulated DE genes in *Zbed6*<sup>-/-</sup> myotubes (red) vs. *Igf2*<sup>AGGCT</sup> myotubes  
742 (blue). (B and C) Expression analysis of *Igf2* (B) and *Zbed6* (C) mRNA in WT, *Zbed6*<sup>-/-</sup> and  
743 *Igf2*<sup>AGGCT</sup> myoblasts and myotubes as count per million (CPM). (D) GO analysis of up-regulated

744 (left) and down-regulated (right) DE genes in both *Zbed6*<sup>-/-</sup> and *Igf2*<sup>AGGCT</sup> myotubes. Bars show  
745 multiple testing corrected *P*-value for enriched GO categories. (E) Heatmap of muscle-specific  
746 genes that were found in muscle contraction GO categories. Expression values are presented as  
747 logCPM and color-scaled from blue (low-expression) to red (high-expression). Each column  
748 represents an individual sample of *Zbed6*<sup>-/-</sup> (KO1 and KO2), *Igf2*<sup>AGGCT</sup> and WT groups. (F)  
749 Heatmap of genes that were found in cell cycle and mitotic nuclear division GO categories.

750

751 **Figure 5. Over-expression of ZBED6 impairs myotube differentiation.** (A)

752 Immunofluorescence staining of myogenin and MyHC in 72 h differentiated myoblasts  
753 transiently over-expressing ZBED6 (ZBED6-OE). (Scale bar: 50  $\mu$ m). (B) Log-fold change in  
754 the expression of *Myog*, *Igf2* and *Myh3* mRNA in control and ZBED6-OE differentiated  
755 myoblasts in comparison to un-differentiated control myoblasts (\*\*\*) *FDR* < 0.001. (C)  
756 Intersection of up-regulated DE genes in *Zbed6*<sup>-/-</sup> myotubes (red) vs. down-regulated DE genes  
757 in ZBED6-OE differentiated myoblasts (green). (D) Heatmap of genes found in AMPK and  
758 insulin signaling pathway.

759

760 **Figure 6. Over-expression of ZBED6 leads to reduced cell viability, cell cycle arrest and**

761 **reduced mitochondria activity.** (A) Cell apoptosis assay of myoblasts over-expressing ZBED6-  
762 GFP fusion protein vs. the control myoblasts expressing GFP. (B) Cell cycle analysis of  
763 myoblasts over-expressing ZBED6-GFP fusion protein vs. GFP expressing cells. (C) The  
764 expression of down-regulated genes found in cell cycle GO categories and containing the  
765 consensus ZBED6 binding motif within 1kb of their TSS (Jiang et al., 2014; Markljung et al.,  
766 2009). (D) MitoTracker Red labeling of ZBED6 transient overexpressing (ZBED6-GFP) cells.

767 (E) Flow cytometry analysis of the intensity of MitoTracker Red labeling of active mitochondria  
768 in WT, ZBED6-over expression (ZBED6-OE), *Zbed6*<sup>-/-</sup> and *Igf2*<sup>AGGCT</sup> cells. (F) A representative  
769 image of JC-1 aggregates, JC-1 monomer of ZBED6-GFP cells to measure the mitochondrial  
770 hyperpolarized membrane potentials. (G) Quantification of the fluorescence intensity of JC-1  
771 aggregates (red) in WT (GFP-neg) and transient ZBED6-OE (GFP-pos) using ImageJ. (Totally  
772 104 WT and 50 ZBED6-OE cells were quantified from three independent experiments.). (H) The  
773 oxygen consumption rate (OCR) and extracellular acidification rate (ECAR) were determined  
774 with the Extracellular Flux Analyzer XFe96 in C2C12 cells (WT, ZBED6-OE, *Zbed6*<sup>-/-</sup> and  
775 *Igf2*<sup>AGGCT</sup>). Results are means ± SEM for five independent observations. (I) OCR and ECAR  
776 were determined in C2C12 WT cells supplemented with 5, 10, 20, 40 ng/ml IGF2 in culture  
777 medium. Results were normalized to control condition and are means ± SEM for at least six  
778 replicates in each condition. \* Denotes  $P < 0.05$  vs. WT using one-way ANOVA.

779

780 **Table 1. GO analysis of up-regulated and down-regulated DE genes in ZBED6-over**  
781 **expressing vs. control (GFP) myoblasts before and after differentiation.**

782

783 **Figure S1. Volcano plots for differentially expressed proteins in SILAC data of medium**  
784 **and lysate fractions of *Zbed6*<sup>-/-</sup> and *Igf2*<sup>AGGCT</sup> myoblasts. The proteins showing the most**  
785 **striking differential expression are highlighted.**

786

787 **Figure S2. GO analysis of 56 shared differentially expressed proteins in *Zbed6*<sup>-/-</sup> and**  
788 ***Igf2*<sup>AGGCT</sup> myoblasts (top) and 140 differentially expressed proteins unique to *Igf2*<sup>AGGCT</sup>**  
789 **myoblasts (bottom).**

790

791 **Figure S3. Transcriptome analysis of differentially expressed genes in WT differentiated**  
792 **myotubes.** (A) Scatter plot of all expressed genes in WT myoblast vs. myotubes. (B) Volcano  
793 plot for differentially expressed genes of WT myoblast vs. myotubes. Red dots indicate  
794 significant fold-change (FDR<0.05). The genes showing the most striking differential expression  
795 are highlighted, *Zbed6* and *Igf2* are highlighted with blue dots. (C) Gene ontology (GO) analysis  
796 of significantly up-regulated (up-reg) DE genes (left) and down-regulated genes (right) in  
797 myotubes. Bars show the significance for GO enriched categories.

798

799 **Figure S4. Volcano plot for differentially expressed genes (FDR<0.05) in 72 h differentiated**  
800 **myoblasts (Control vs. ZBED6-OE). The genes showing the most striking differential**  
801 **expression are highlighted.**

802

803 **Figure S5. Cell viability assay of myoblasts over-expressing ZBED6-GFP fusion protein vs.**  
804 **the control myoblasts expressing GFP.**

805

806 **Figure S6. qPCR validation of cell cycle genes associated with ZBED6 binding sites.**

807 (mean±SEM), \*P<0.05, \*\*P<0.01, Student's t-test.

808

809 **Table S1. SILAC data for differentially expressed proteins in *Zbed6*<sup>-/-</sup> or *Igf2*<sup>AGGCT</sup> (GGCT)**  
810 **myoblasts**

811

812 **Table S2. RNA-seq data for differentially expressed genes in *Zbed6*<sup>-/-</sup> or *Igf2*<sup>ΔGGCT</sup> mutant**  
813 **(GGCT) myoblasts.**

814

815 **Table S3. SILAC and RNA-seq data for differentially expressed proteins in *Zbed6*<sup>-/-</sup>**  
816 **myoblasts with ZBED6 binding site identified by CHIP-seq analysis.**

817

818 **Table S4. Differentially expressed genes in *Zbed6* knock-out<sup>-/-</sup> or *Igf2*<sup>ΔGGCT</sup> differentiated**  
819 **myotubes.**

820

821 **Table S5. GO analysis of the differentially expressed (DE) genes after ZBED6-**  
822 **overexpression (ZBED6-OE) in growing (GM) and differentiated (diff) myoblasts.**

823

824 **Table S6. The primer sequences used for qPCR analysis.**

# Figure 1

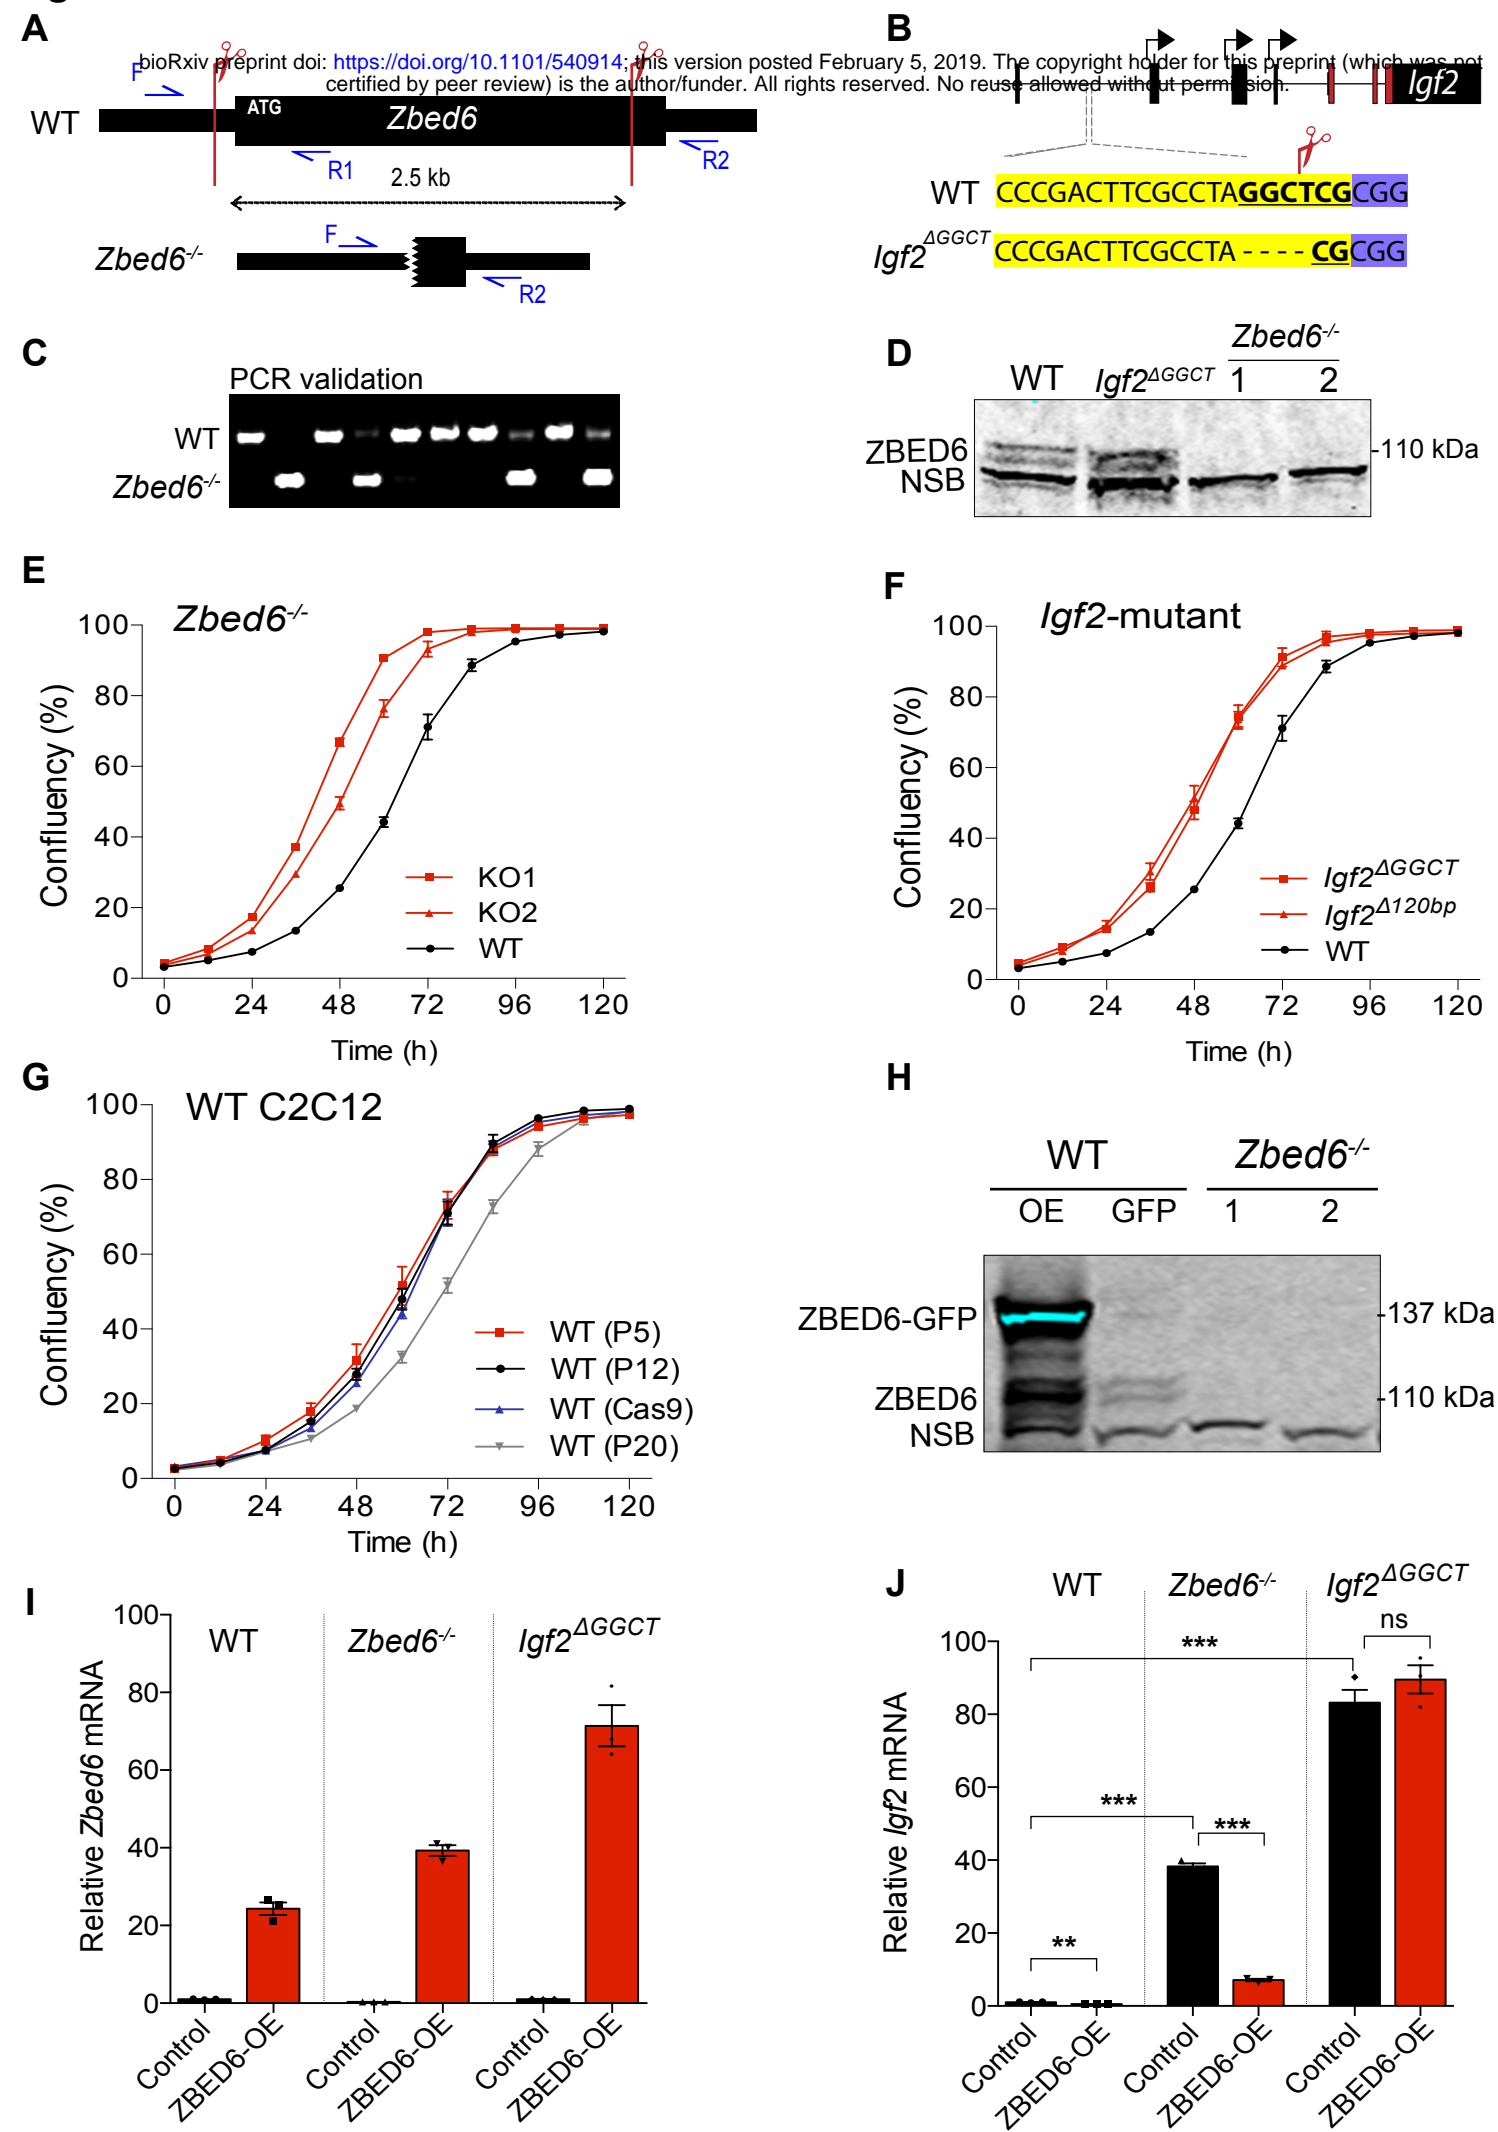



**Figure 2**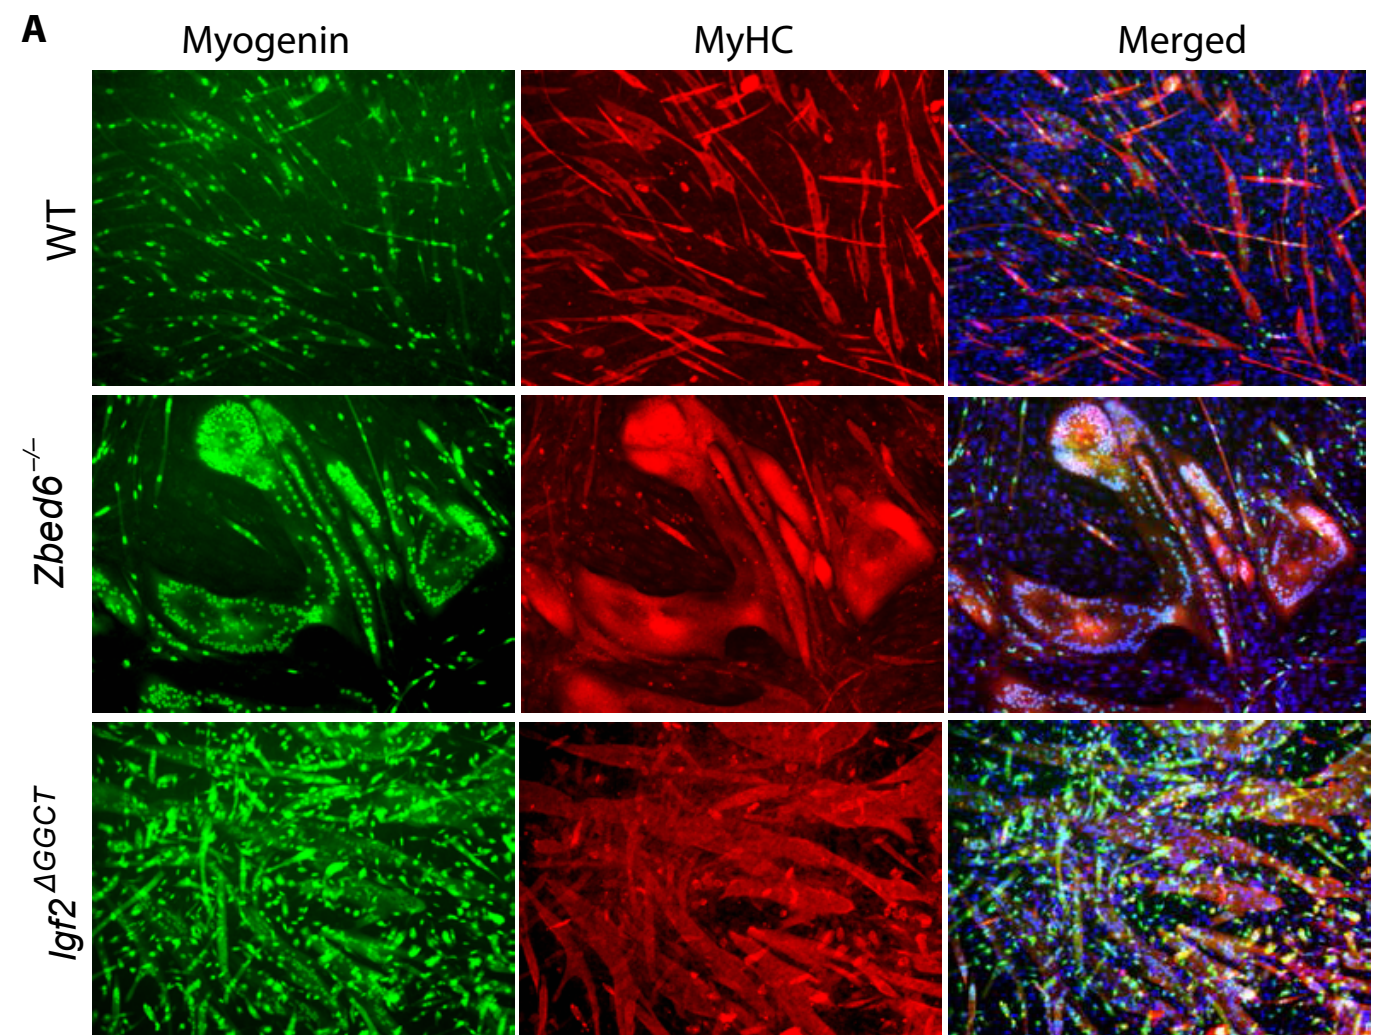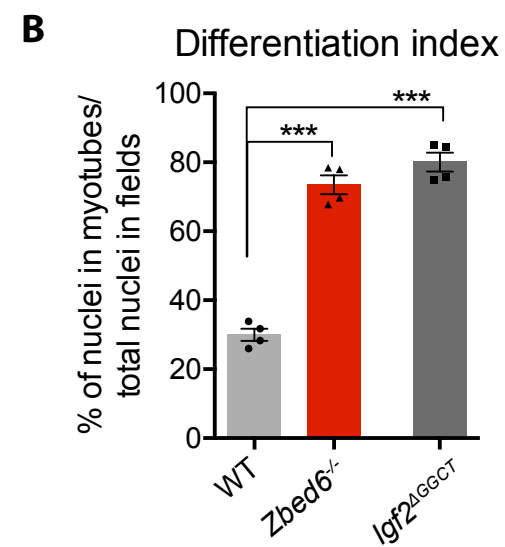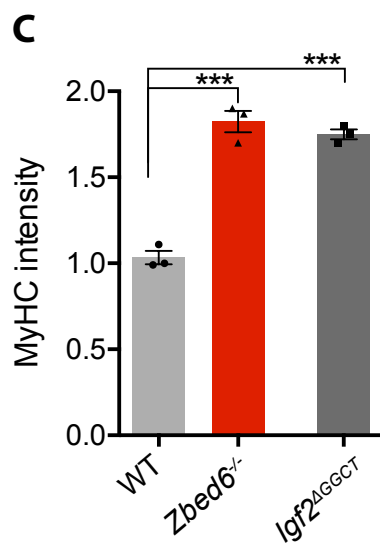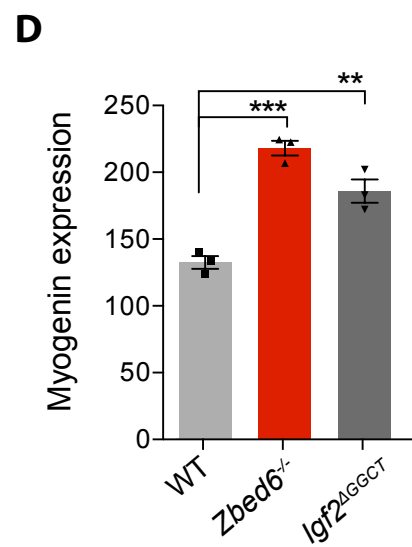

**Figure 3**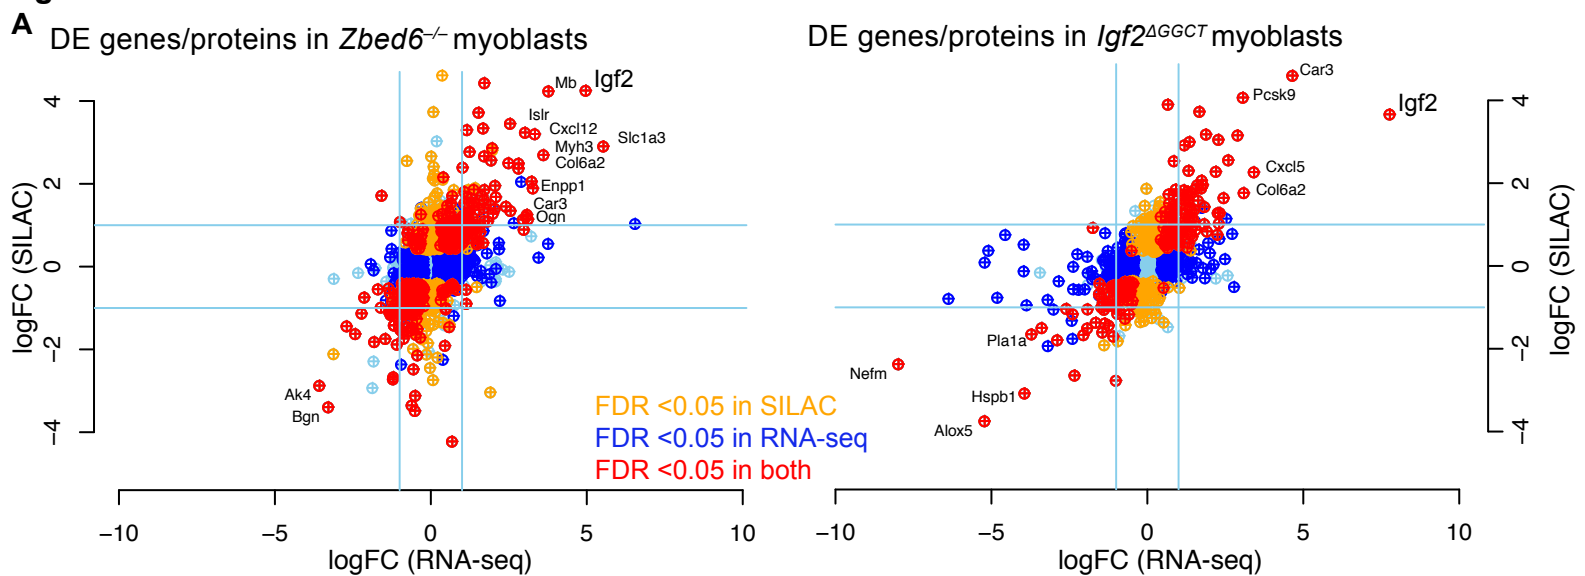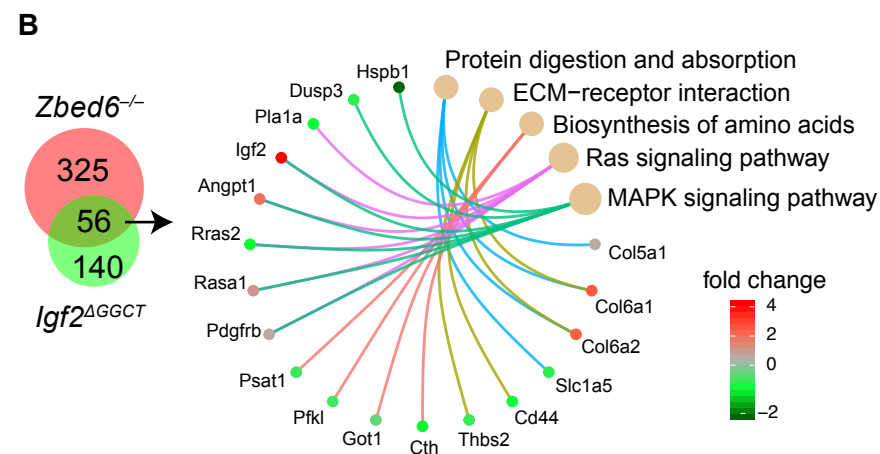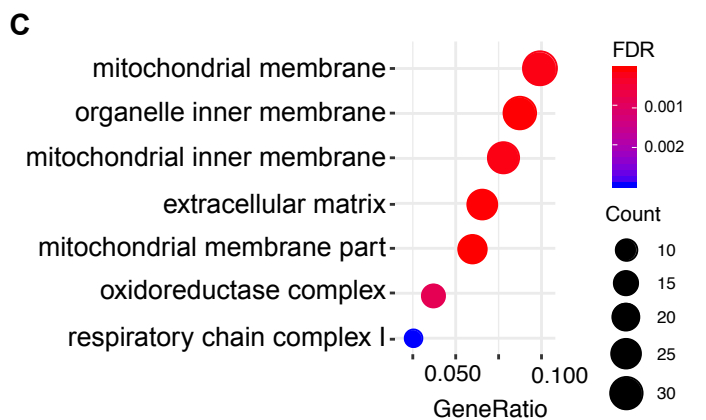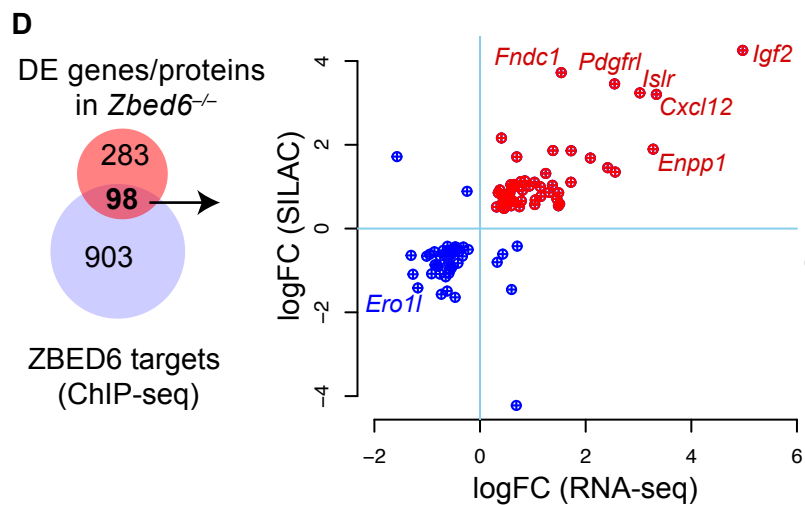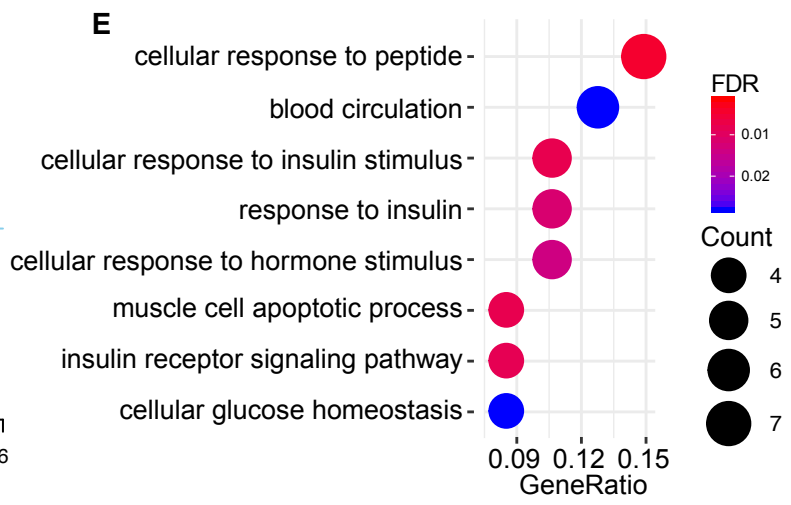



**Figure 4****A**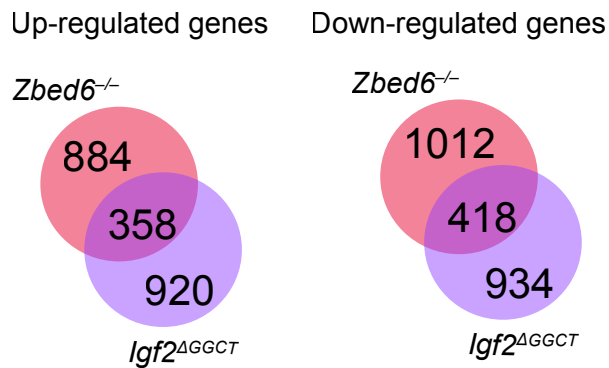**B**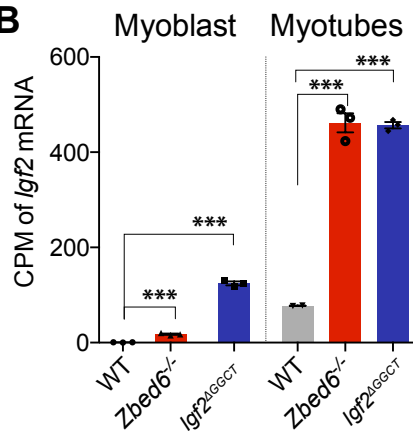**C**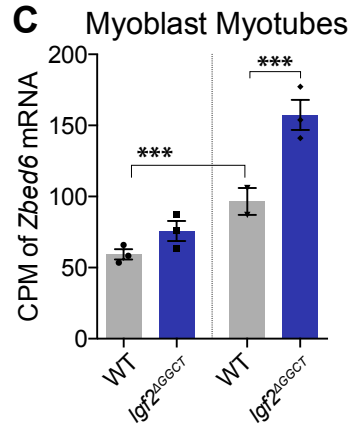**D**Up-regulated in *Zbed6*<sup>-/-</sup> & *Igf2*<sup>ΔGGCT</sup> myotubes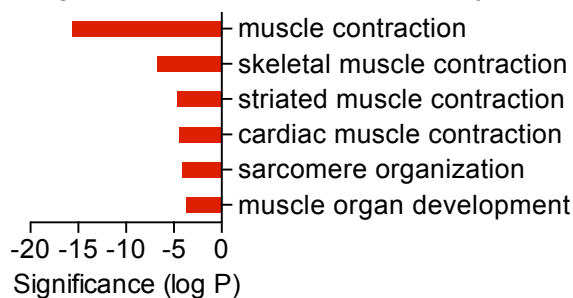Down-regulated in *Zbed6*<sup>-/-</sup> & *Igf2*<sup>ΔGGCT</sup> myotubes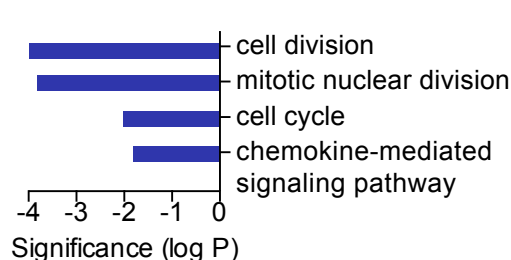**E**

LogCPM of muscle genes

Myoblasts      Myotubes

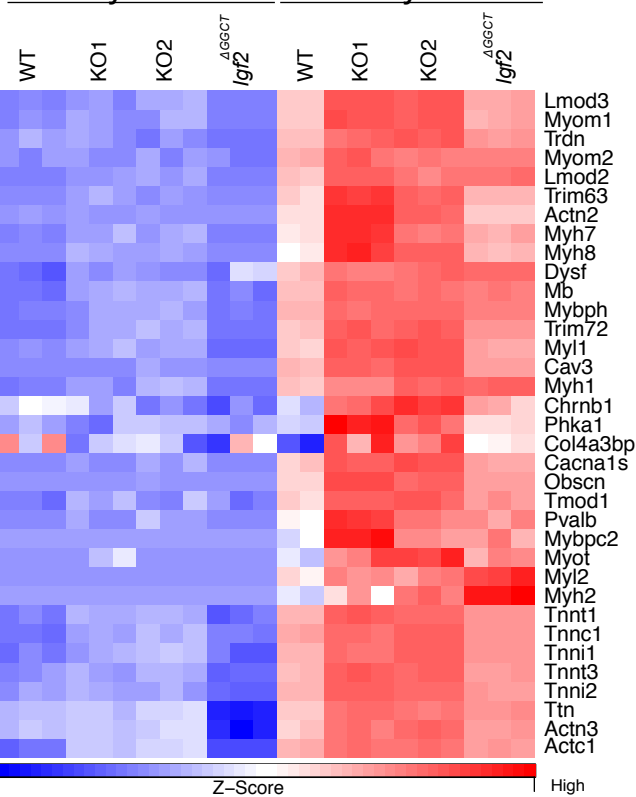**F**

LogCPM of mitotic nuclear division

Myoblasts      Myotubes

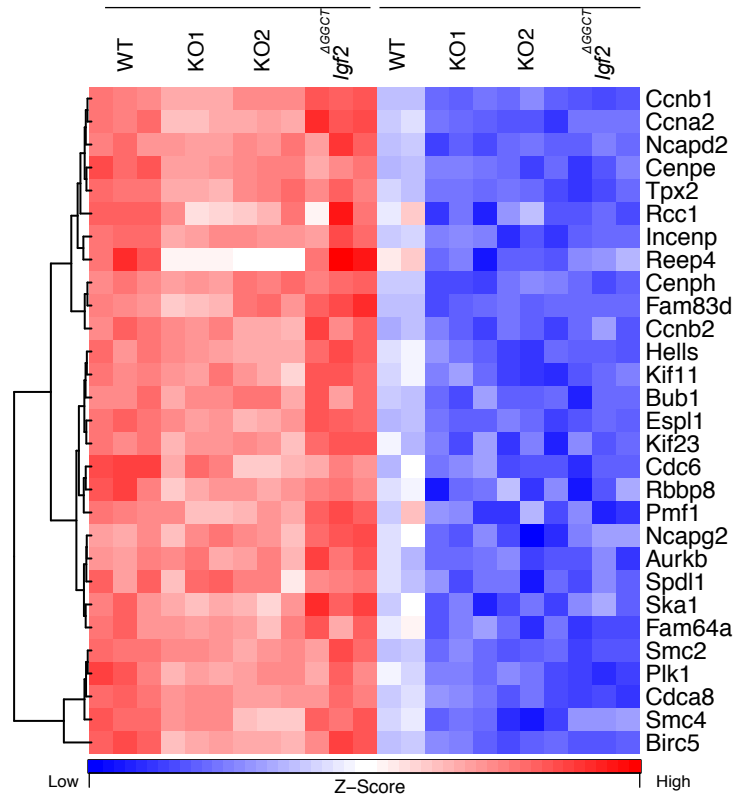

**Figure 5**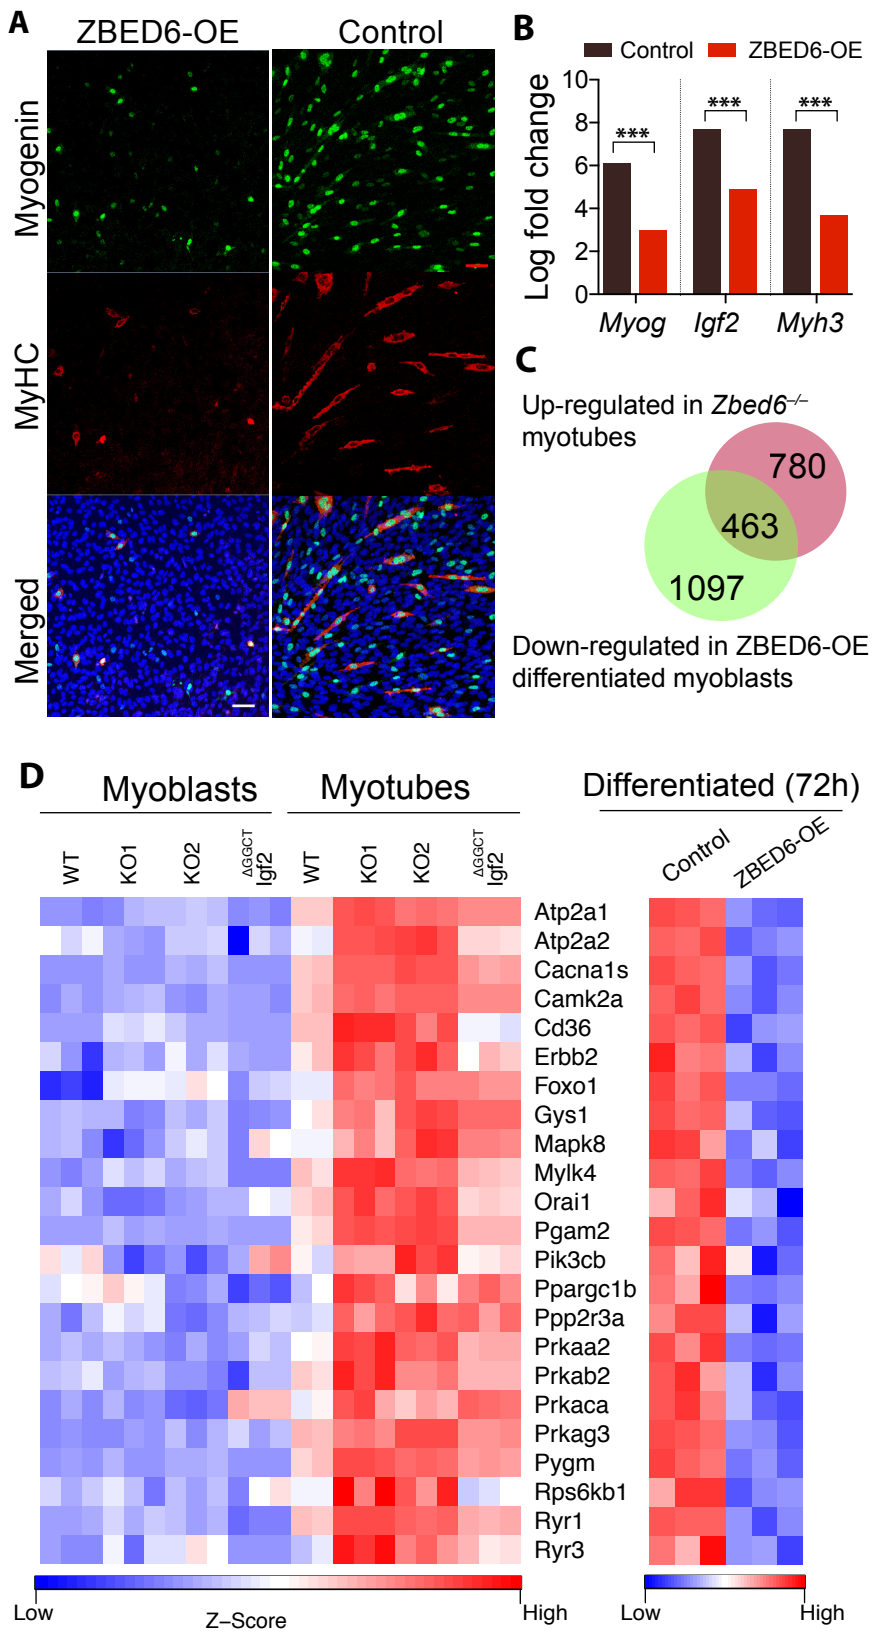

**Figure 6**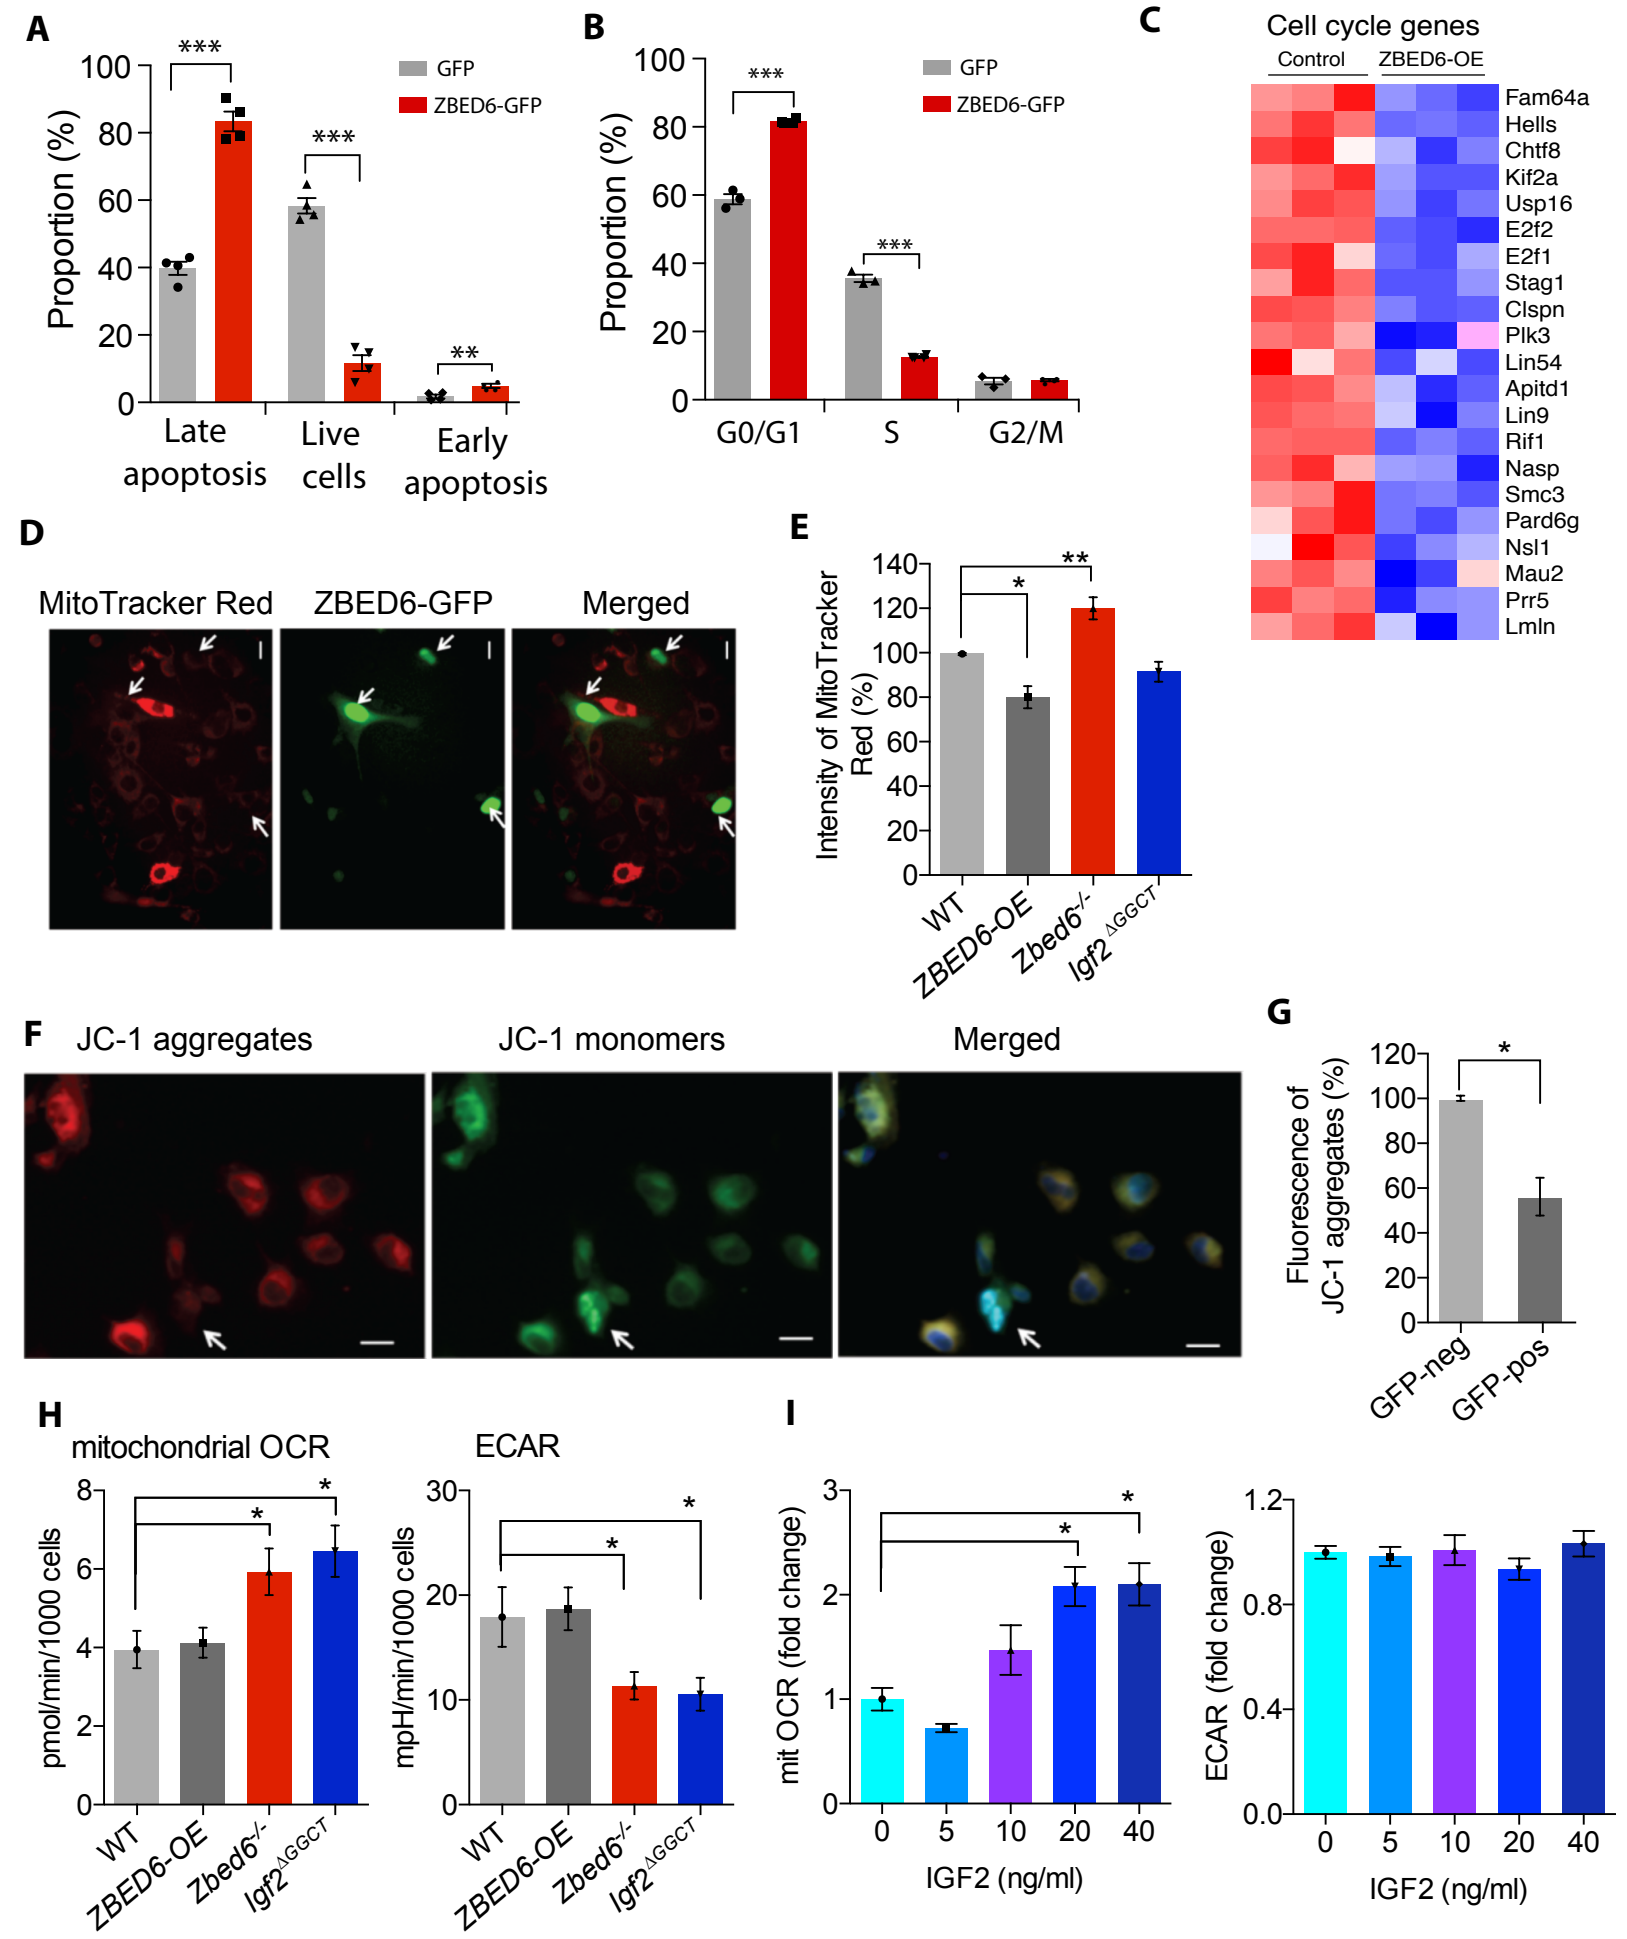

Table 1. GO analysis of up-regulated and down-regulated DE genes in ZBED6-OE vs. control (GFP) differentiated myoblasts

| Term                               | Count | FDR     |
|------------------------------------|-------|---------|
| Down-regulated                     |       |         |
| muscle contraction                 | 28    | 2.5E-11 |
| cell adhesion                      | 75    | 1.2E-09 |
| multicellular organism development | 129   | 6.6E-09 |
| cardiac muscle contraction         | 24    | 3.1E-08 |
| skeletal muscle contraction        | 19    | 4.3E-08 |
| Up-regulated                       |       |         |
| cell cycle                         | 127   | 4.7E-25 |
| mitotic nuclear division           | 81    | 9.3E-24 |
| cell division                      | 92    | 1.4E-22 |
| DNA replication                    | 39    | 7.4E-10 |
| chromosome segregation             | 30    | 1.1E-08 |

Table 2. GO analysis of up-regulated and down-regulated DE genes in ZBED6-OE vs. control (GFP) proliferating myoblasts

| Term                                 | Count     | FDR            |
|--------------------------------------|-----------|----------------|
| Down-regulated                       |           |                |
| mRNA processing                      | 63        | 3.7E-04        |
| DNA replication initiation           | 13        | 6.3E-04        |
| <b>cell cycle</b>                    | <b>98</b> | <b>1.2E-03</b> |
| DNA replication                      | 34        | 1.6E-03        |
| mitotic nuclear division             | 54        | 8.0E-03        |
| Up-regulated                         |           |                |
| cellular response to interferon-beta | 21        | 1.5E-09        |
| immune system process                | 61        | 5.3E-08        |
| innate immune response               | 54        | 7.7E-07        |
| defense response to virus            | 34        | 1.7E-06        |
| oxidation-reduction process          | 86        | 4.8E-03        |
